# Supplementary material for: A heterotrimetallic synthetic approach in versatile functionalization of nanosized {MxCu13–xW7}3+ and {M1Cu8W6} (M = Co, Ni, Mn, Fe) metal–cyanide magnetic clusters
Source: Royal Society of Chemistry journal article supplement (doi:10.1039/c9qi00898e), 2019-01-01
Supplement: c9qi00898e1.pdf [file c9qi00898e1.pdf]

## SUPPORTING INFORMATION

# Heterotrimetallic synthetic approach in versatile functionalization of nanosized $\{M_xCu_{13-x}W_7\}^{3+}$ and $\{M_1Cu_8W_6\}$ ( $M = Co, Ni, Mn, Fe$ ) metal–cyanide magnetic clusters

Michał Liberka,<sup>a</sup> Jędrzej Kobylarczyk,<sup>a</sup> Tadeusz Muziol,<sup>b</sup> Shin-ichi Ohkoshi,<sup>c</sup> Szymon Chorazy\*<sup>a,c</sup>  
and Robert Podgajny\*<sup>a</sup>

<sup>[a]</sup> Faculty of Chemistry, Jagiellonian University, Gronostajowa 2, 30-387 Kraków, Poland. <sup>[b]</sup> Department of Chemistry, School of Science, The University of Tokyo, 7-3-1 Hongo, Bunkyo-ku, Tokyo 113-0033, Japan.

\*Corresponding authors: robert.podgajny@uj.edu.pl; chorazy@chemia.uj.edu.pl

|                                                                                                                                                                                                                                                                                                                                                                                                                                                              |     |
|--------------------------------------------------------------------------------------------------------------------------------------------------------------------------------------------------------------------------------------------------------------------------------------------------------------------------------------------------------------------------------------------------------------------------------------------------------------|-----|
| Results of SEM/EDXMA analysis of transition metal ions composition in <b>1–5</b> with the related comment. (Table S1)                                                                                                                                                                                                                                                                                                                                        | S2  |
| Crystal data and structure refinement for <b>1</b> and <b>2</b> compared with the previously reported analogous $\{[Cu^{II}_{13}(Me_3tacn)_{12}(H_2O)][W^{IV}(CN)_8]_5[W^V(CN)_8]_2\} \cdot 24H_2O$ ( <b>Cu<sub>13</sub>W<sub>7</sub></b> ) compound. (Table S2)                                                                                                                                                                                             | S5  |
| Detailed structural parameters of 3d metal complexes in <b>1</b> and <b>2</b> compared with the previously reported analogous $\{[Cu^{II}_{13}(Me_3tacn)_{12}(H_2O)][W^{IV}(CN)_8]_5[W^V(CN)_8]_2\} \cdot 24H_2O$ ( <b>Cu<sub>13</sub>W<sub>7</sub></b> ) compound. (Table S3)                                                                                                                                                                               | S6  |
| Detailed structural parameters of $[W(CN)_8]^{3-}$ complexes in <b>1</b> and <b>2</b> compared with the previously reported analogous $\{[Cu^{II}_{13}(Me_3tacn)_{12}(H_2O)][W^{IV}(CN)_8]_5[W^V(CN)_8]_2\} \cdot 24H_2O$ ( <b>Cu<sub>13</sub>W<sub>7</sub></b> ) compound. (Table S4)                                                                                                                                                                       | S7  |
| Results of Continuous Shape Measure (CSM) analysis for metal complexes in <b>1</b> and <b>2</b> . (Table S5)                                                                                                                                                                                                                                                                                                                                                 | S8  |
| Comparison of the asymmetric units of <b>1</b> ( <i>a</i> ) and <b>2</b> ( <i>b</i> ) with the metal atoms labelling schemes. (Figure S1)                                                                                                                                                                                                                                                                                                                    | S9  |
| Views of the supramolecular network of <b>1</b> shown along three main crystallographic axes. (Figure S2)                                                                                                                                                                                                                                                                                                                                                    | S10 |
| Crystal structure of <b>2</b> : views on the coordination skeleton of $\{Ni_{1.5}Cu_{11.5}W_7\}^{3+}$ clusters, detailed views on intra-cluster Ni and Cu complexes, and the supramolecular arrangement of clusters and uncoordinated $[W(CN)_8]^{3-}$ ions within <i>ab</i> crystallographic plane with the indication of the related shortest intermetallic contacts. (Figure S3)                                                                          | S11 |
| Experimental powder X-ray diffraction (PXRD) patterns of compounds <b>1–4</b> compared with the PXRD patterns calculated from the structural models of <b>1</b> and <b>2</b> obtained within the single-crystal X-ray diffraction structural analyses. (Figure S4)                                                                                                                                                                                           | S12 |
| Crystal data and structure refinement for <b>5</b> compared with the previously reported analogous $\{Cu^{II}[Cu^{II}(Me_3tacn)_8][W^V(CN)_8]_6\} \cdot 5MeOH \cdot 31H_2O$ ( <b>Cu<sub>9</sub>W<sub>6</sub></b> ) compound. (Table S6)                                                                                                                                                                                                                      | S13 |
| Detailed structural parameters of <b>5</b> compared with the previously reported analogous $\{Cu^{II}[Cu^{II}(Me_3tacn)_8][W^V(CN)_8]_6\} \cdot 5MeOH \cdot 31H_2O$ ( <b>Cu<sub>9</sub>W<sub>6</sub></b> ) compound. (Table S7)                                                                                                                                                                                                                              | S14 |
| Results of Continuous Shape Measure (CSM) analysis for six- and eight-coordinated metal complexes in <b>5</b> . (Table S8)                                                                                                                                                                                                                                                                                                                                   | S15 |
| View of the asymmetric unit of <b>5</b> with the metal atoms labelling scheme. (Figure S5)                                                                                                                                                                                                                                                                                                                                                                   | S16 |
| Views of the supramolecular network of <b>5</b> shown along three main crystallographic axes. (Figure S6)                                                                                                                                                                                                                                                                                                                                                    | S17 |
| Experimental powder X-ray diffraction (PXRD) pattern of <b>5</b> compared with the PXRD pattern calculated from the structural model obtained in the single-crystal X-ray diffraction structural analysis. (Figure S7)                                                                                                                                                                                                                                       | S18 |
| Infrared absorption spectra of <b>1–5</b> measured for the selected single crystals in the 4000–700 $cm^{-1}$ range, compared with the reference compounds of $\{[Cu^{II}_{13}(Me_3tacn)_{12}(H_2O)][W^{IV}(CN)_8]_5[W^V(CN)_8]_2\} \cdot 24H_2O$ ( <b>Cu<sub>13</sub>W<sub>7</sub></b> ) and $\{Co^{II}[Co^{II}(MeOH)_3]_8[W^V(CN)_8]_6\} \cdot 19H_2O$ ( <b>Co<sub>9</sub>W<sub>6</sub></b> ) molecules. (Figure S8)                                       | S19 |
| UV–vis absorption spectra of <b>1–5</b> measured at room temperature in the 30000–1200 $cm^{-1}$ range, compared with the reference compounds of $\{[Cu^{II}_{13}(Me_3tacn)_{12}(H_2O)][W^{IV}(CN)_8]_5[W^V(CN)_8]_2\} \cdot 24H_2O$ ( <b>Cu<sub>13</sub>W<sub>7</sub></b> ) and $\{Co^{II}_9(2,2',2''\text{-bpdo})_{6.5}(MeOH)_{11}[W^V(CN)_8]_6\} \cdot 8H_2O \cdot 2MeCN \cdot 27MeOH$ ( <b>Co<sub>9</sub>W<sub>6</sub>-bpdo</b> ) molecules. (Figure S9) | S20 |
| Four representative magnetic models analysed for the 20-centred cluster-based compounds <b>1–4</b> . (Figure S10)                                                                                                                                                                                                                                                                                                                                            | S21 |
| Predicted values of maximal $\chi_M T$ product and saturation magnetization for the respective magnetic models analysed for the 20-centred cluster-based compound <b>2</b> . (Table S9)                                                                                                                                                                                                                                                                      | S22 |
| Predicted values of maximal $\chi_M T$ product and saturation magnetization for the 20-centred cluster-based compounds <b>1</b> and <b>3</b> using the selected magnetic model A. (Table S10)                                                                                                                                                                                                                                                                | S23 |
| Predicted values of maximal $\chi_M T$ and saturation magnetization for <b>4</b> using the selected magnetic model A. (Table S11)                                                                                                                                                                                                                                                                                                                            | S24 |

**Table S1.** Results of SEM/EDXMA analysis of transition metal ions composition in 1–5. (*part 1 of 3*)

| metal                                                                                                                                                         | Cu               | W                | Co                | Ni                | Mn | Fe |
|---------------------------------------------------------------------------------------------------------------------------------------------------------------|------------------|------------------|-------------------|-------------------|----|----|
| <b>compound 1</b>                                                                                                                                             |                  |                  |                   |                   |    |    |
| measured atomic composition<br>(only metals included, independent<br>measurements) <sup>a</sup> / %                                                           | 56.6(3.1)        | 39.1(1.5)        | 4.3(0.7)          | -                 | -  | -  |
|                                                                                                                                                               | 56.2(3.0)        | 39.2(1.5)        | 4.6(0.7)          | -                 | -  | -  |
|                                                                                                                                                               | 56.0(3.2)        | 39.6(2.8)        | 4.4(0.7)          | -                 | -  | -  |
|                                                                                                                                                               | 55.6(3.1)        | 40.1(1.6)        | 4.3(0.7)          | -                 | -  | -  |
|                                                                                                                                                               | 54.3(3.8)        | 39.5(1.9)        | 6.2(0.9)          | -                 | -  | -  |
|                                                                                                                                                               | 56.2(3.1)        | 37.3(1.6)        | 6.6(1.3)          | -                 | -  | -  |
|                                                                                                                                                               | 52.8(3.4)        | 42.9(1.7)        | 4.3(0.8)          | -                 | -  | -  |
|                                                                                                                                                               | 54.5(2.5)        | 40.3(2.2)        | 5.2(1.0)          | -                 | -  | -  |
| 56.1(2.2)                                                                                                                                                     | 38.3(2.9)        | 5.6(0.7)         | -                 | -                 | -  |    |
| average atomic composition<br>(only metals included) / %                                                                                                      | 55.4(3.0)        | 39.5(2.0)        | 5.1(0.8)          | -                 | -  | -  |
| relative atomic composition<br>(only metals included, calculated<br>for 8 W centers)                                                                          | 11.3(0.8)        | 8                | 1.1(0.2)          | -                 | -  | -  |
| proposed metal composition                                                                                                                                    | 12               | 8                | 1                 | -                 | -  | -  |
| mass composition<br>(only metals) / %                                                                                                                         | 32.0(1.7)        | 65.2(3.3)        | 2.7(0.4)          | -                 | -  | -  |
| mass composition<br>(for full formula based on the proposed<br>metal composition taking into account<br>results of CHN) / %                                   | <b>10.6(0.6)</b> | <b>21.6(1.1)</b> | <b>0.90(0.14)</b> | -                 | -  | -  |
| mass composition calculated for<br>Co <sub>1</sub> Cu <sub>12</sub> W <sub>8</sub> C <sub>175</sub> H <sub>354</sub> N <sub>100</sub> O <sub>48</sub> / %     | 11.0             | 21.3             | 0.85              | -                 | -  | -  |
| <b>compound 2</b>                                                                                                                                             |                  |                  |                   |                   |    |    |
| measured atomic composition<br>(only metals included, independent<br>measurements) / %                                                                        | 54.7(2.9)        | 38.8(2.5)        | -                 | 6.5(0.8)          | -  | -  |
|                                                                                                                                                               | 54.4(2.9)        | 38.2(2.6)        | -                 | 7.4(0.8)          | -  | -  |
|                                                                                                                                                               | 53.7(2.9)        | 38.7(1.5)        | -                 | 7.4(0.8)          | -  | -  |
|                                                                                                                                                               | 52.7(3.1)        | 39.6(2.7)        | -                 | 7.7(0.8)          | -  | -  |
|                                                                                                                                                               | 54.7(3.0)        | 37.4(2.6)        | -                 | 8.0(0.8)          | -  | -  |
|                                                                                                                                                               | 55.2(2.9)        | 37.9(2.6)        | -                 | 6.9(0.8)          | -  | -  |
|                                                                                                                                                               | 54.0(2.8)        | 39.0(1.5)        | -                 | 7.1(0.8)          | -  | -  |
|                                                                                                                                                               | 55.5(3.0)        | 37.5(2.7)        | -                 | 6.9(1.8)          | -  | -  |
|                                                                                                                                                               | 53.1(3.2)        | 40.0(1.6)        | -                 | 6.9(0.9)          | -  | -  |
| average atomic composition<br>(only metals included) / %                                                                                                      | 54.2(3.0)        | 38.6(2.3)        | -                 | 7.2(0.9)          | -  | -  |
| relative atomic composition<br>(only metals included, calculated<br>for 8 W centers)                                                                          | 11.3(0.6)        | 8                | -                 | 1.5(0.2)          | -  | -  |
| proposed metal composition                                                                                                                                    | 11.5             | 8                | -                 | 1.5               | -  | -  |
| mass composition<br>(only metals) / %                                                                                                                         | 31.4(1.7)        | 64.7(3.9)        | -                 | 3.86(0.48)        | -  | -  |
| mass composition<br>(for full formula based on the proposed<br>metal composition taking into account<br>results of CHN) / %                                   | <b>10.4(0.6)</b> | <b>21.5(1.3)</b> | -                 | <b>1.28(0.16)</b> | -  | -  |
| mass composition calculated for<br>Ni <sub>1.5</sub> Cu <sub>11.5</sub> W <sub>8</sub> C <sub>175</sub> H <sub>354</sub> N <sub>100</sub> O <sub>48</sub> / % | 10.6             | 21.3             | -                 | 1.27              | -  | -  |

**Table S1.** Results of SEM/EDXMA analysis of transition metal ions composition in 1–5. (*part 2 of 3*)

| metal                                                                                                                               | Cu               | W                | Co | Ni       | Mn                | Fe                |
|-------------------------------------------------------------------------------------------------------------------------------------|------------------|------------------|----|----------|-------------------|-------------------|
| <b>compound 3</b>                                                                                                                   |                  |                  |    |          |                   |                   |
| measured atomic composition<br>(only metals included, independent<br>measurements) / %                                              | 56.7(2.9)        | 38.0(2.6)        | -  | -        | 8.3(0.7)          | -                 |
|                                                                                                                                     | 54.7(3.1)        | 39.2(2.7)        | -  | -        | 6.1(0.7)          | -                 |
|                                                                                                                                     | 54.3(3.0)        | 38.8(2.6)        | -  | -        | 6.9(0.7)          | -                 |
|                                                                                                                                     | 54.6(3.1)        | 38.8(2.8)        | -  | -        | 7.1(0.7)          | -                 |
|                                                                                                                                     | 54.8(3.0)        | 38.3(2.6)        | -  | -        | 6.9(0.7)          | -                 |
|                                                                                                                                     | 54.5(2.8)        | 38.2(1.5)        | -  | -        | 6.3(0.6)          | -                 |
|                                                                                                                                     | 55.7(3.2)        | 37.6(2.8)        | -  | -        | 6.7(1.3)          | -                 |
| 55.7(3.0)                                                                                                                           | 38.9(2.7)        | -                | -  | 5.5(0.7) | -                 |                   |
| average atomic composition<br>(only metals included) / %                                                                            | 55.1(3.0)        | 38.5(2.5)        | -  | -        | 6.7(0.8)          | -                 |
| relative atomic composition<br>(only metals included, calculated<br>for 8 W centers)                                                | 11.5(0.6)        | <b>8</b>         | -  | -        | 1.4(0.2)          | -                 |
| proposed metal composition                                                                                                          | 11.5             | 8                | -  | -        | 1.5               | -                 |
| mass composition<br>(only metals) / %                                                                                               | 32.0(1.7)        | 64.7(4.2)        | -  | -        | 3.37(0.41)        | -                 |
| mass composition<br>(for full formula based on the proposed<br>metal composition taking into account<br>results of CHN) / %         | <b>10.6(0.6)</b> | <b>21.4(1.4)</b> | -  | -        | <b>1.12(0.14)</b> | -                 |
| mass composition calculated for<br>$\text{Co}_1\text{Cu}_{12}\text{W}_8\text{C}_{175}\text{H}_{354}\text{N}_{100}\text{O}_{48}$ / % | 10.6             | 21.3             | -  | -        | 1.19              | -                 |
| <b>compound 4</b>                                                                                                                   |                  |                  |    |          |                   |                   |
| measured atomic composition<br>(only metals included, independent<br>measurements) / %                                              | 55.6(3.2)        | 37.1(2.8)        | -  | -        | -                 | 7.3(0.7)          |
|                                                                                                                                     | 56.3(2.9)        | 36.1(2.5)        | -  | -        | -                 | 6.4(0.7)          |
|                                                                                                                                     | 54.8(3.2)        | 37.6(2.8)        | -  | -        | -                 | 7.6(0.7)          |
|                                                                                                                                     | 54.0(3.2)        | 38.7(1.6)        | -  | -        | -                 | 7.4(0.7)          |
|                                                                                                                                     | 53.4(3.0)        | 40.1(1.6)        | -  | -        | -                 | 6.6(0.7)          |
|                                                                                                                                     | 53.6(3.1)        | 38.0(2.7)        | -  | -        | -                 | 8.4(0.7)          |
|                                                                                                                                     | 54.3(3.1)        | 39.3(1.6)        | -  | -        | -                 | 6.4(0.7)          |
|                                                                                                                                     | 54.8(1.9)        | 38.2(1.6)        | -  | -        | -                 | 7.2(0.7)          |
| average atomic composition<br>(only metals included) / %                                                                            | 54.6(3.0)        | 38.1(2.2)        | -  | -        | -                 | 7.2(0.7)          |
| relative atomic composition<br>(only metals included, calculated<br>for 8 W centers)                                                | 11.5(0.6)        | 8                | -  | -        | -                 | 1.5(0.2)          |
| proposed metal composition                                                                                                          | 11.5             | 8                | -  | -        | -                 | 1.5               |
| mass composition<br>(only metals) / %                                                                                               | 31.9(1.7)        | 64.4(3.7)        | -  | -        | -                 | 3.70(0.36)        |
| mass composition<br>(for full formula based on the proposed<br>metal composition taking into account<br>results of CHN) / %         | <b>10.6(0.6)</b> | <b>21.3(1.2)</b> | -  | -        | -                 | <b>1.22(0.12)</b> |
| mass composition calculated for<br>$\text{Co}_1\text{Cu}_{12}\text{W}_8\text{C}_{175}\text{H}_{354}\text{N}_{100}\text{O}_{48}$ / % | 10.6             | 21.3             | -  | -        | -                 | 1.21              |

**Table S1.** Results of SEM/EDXMA analysis of transition metal ions composition in **1–5**. (*part 3 of 3*)

| metal                                                                                                                               | Cu               | W                | Co                | Ni | Mn | Fe |
|-------------------------------------------------------------------------------------------------------------------------------------|------------------|------------------|-------------------|----|----|----|
| <b>compound 5</b>                                                                                                                   |                  |                  |                   |    |    |    |
| measured atomic composition<br>(only metals included,<br>independent measurements) / %                                              | 53.6(2.9)        | 39.3(1.5)        | 6.3(0.6)          | -  | -  | -  |
|                                                                                                                                     | 53.2(3.2)        | 39.9(1.5)        | 5.4(0.7)          | -  | -  | -  |
|                                                                                                                                     | 53.9(3.0)        | 40.4(2.8)        | 6.8(0.6)          | -  | -  | -  |
|                                                                                                                                     | 53.1(3.4)        | 39.4(1.6)        | 6.7(0.7)          | -  | -  | -  |
|                                                                                                                                     | 53.6(3.0)        | 38.3(1.9)        | 5.8(0.9)          | -  | -  | -  |
|                                                                                                                                     | 52.7(3.1)        | 41.1(1.6)        | 7.0(0.6)          | -  | -  | -  |
|                                                                                                                                     | 54.5(2.8)        | 37.2(1.7)        | 6.5(0.9)          | -  | -  | -  |
|                                                                                                                                     | 52.9(2.5)        | 40.1(2.2)        | 6.2(0.6)          | -  | -  | -  |
| 53.1(2.6)                                                                                                                           | 38.0(2.9)        | 6.6(0.8)         | -                 | -  | -  |    |
| average atomic composition<br>(only metals included) / %                                                                            | 53.4(3.0)        | 39.3(2.0)        | 6.4(0.7)          | -  | -  | -  |
| relative atomic composition<br>(only metals included, calculated<br>for 6 W centers)                                                | 8.1(0.5)         | 6                | 1.0(0.1)          | -  | -  | -  |
| proposed metal composition                                                                                                          | 8                | 6                | 1                 | -  | -  | -  |
| mass composition<br>(only metals) / %                                                                                               | 30.9(1.7)        | 65.7(3.3)        | 3.43(0.38)        | -  | -  | -  |
| mass composition<br>(for full formula based on the<br>proposed metal composition<br>taking into account results of<br>CHN) / %      | <b>10.3(0.6)</b> | <b>21.9(1.1)</b> | <b>1.15(0.13)</b> | -  | -  | -  |
| mass composition calculated for<br>$\text{Co}_1\text{Cu}_{12}\text{W}_8\text{C}_{175}\text{H}_{354}\text{N}_{100}\text{O}_{48}$ / % | 10.2             | 22.0             | 1.18              | -  | -  | -  |

<sup>a</sup>For each compound, EDXMA (energy dispersive X-ray microanalysis) analyses were conducted on a few different single crystals and on a few places of the selected single crystal.

#### Comment to Table S1 – procedure for determination of atomic compositions of compounds 1–5

Atomic composition for metal centers embedded in the crystalline samples of **1–5** was measured using energy-dispersive X-ray microanalysis for a few representative crystals. The results of atomic compositions of W, Cu and a third metal center were averaged. The obtained average atomic compositions included only metals, and they were used to estimate the relative metal composition. It was calculated assuming 8 W-centers for compounds **1–4** and 6 W-centers for **5**, according to the crystal structures. The resulting relative atomic composition indicated the proposed metal composition of  $\{\text{Cu}_{12}\text{Co}_1\text{W}_8\}$  in **1**,  $\{\text{Cu}_{11.5}\text{Ni}_{1.5}\text{W}_8\}$  in **2**,  $\{\text{Cu}_{11.5}\text{Mn}_{1.5}\text{W}_8\}$  in **3**,  $\{\text{Cu}_{11.5}\text{Fe}_{1.5}\text{W}_8\}$  in **4**, and  $\{\text{Cu}_8\text{Co}_1\text{W}_6\}$  in **5**. These proposed metal compositions were used to determine the full formula of the respective compounds, taking into account the results of CHN elemental analyses. We found that compounds **1–4** exhibit the identical solvent content of 44 water molecules and 3 MeOH molecules per  $\{\text{Cu}_{13-x}\text{M}_x\text{W}_8\}$  unit while 31 water molecules and 5 MeOH molecules can be assigned to each  $\{\text{Cu}_8\text{Co}_1\text{W}_6\}$  unit in **5** (please compare the results of CHN elemental analysis shown in Experimental section). Assuming these compositions, we could determine the experimental mass compositions for metals in the whole compounds. We used the average atomic composition which was firstly used to determine the mass composition for only metals, and, then, mass composition for metals including all non-metal atoms (C, H, N, O) of organic ligands, cyanides and solvent molecules. The resulting mass composition of metals for full formulas are shown in **bold** in Table S1. They were compared with the calculated mass composition for the proposed formulas, and a good agreement within the experimental error was found (see above). It confirmed the proposed formulas of all investigated compounds.

**Table S2.** Crystal data and structure refinement for **1** and **2** compared with the previously reported analogous  $\{[\text{Cu}^{\text{II}}_{13}(\text{Me}_3\text{tacn})_{12}(\text{H}_2\text{O})][\text{W}^{\text{IV}}(\text{CN})_8]_5[\text{W}^{\text{V}}(\text{CN})_8]_2\} \cdot 24\text{H}_2\text{O}$  (**Cu<sub>13</sub>W<sub>7</sub>**) compound.

| compound                                                        | <b>1</b>                                                                                                          | <b>2</b>                                                                                                              | <b>Cu<sub>13</sub>W<sub>7</sub></b>                                                               |
|-----------------------------------------------------------------|-------------------------------------------------------------------------------------------------------------------|-----------------------------------------------------------------------------------------------------------------------|---------------------------------------------------------------------------------------------------|
|                                                                 | this work                                                                                                         | this work                                                                                                             | <i>Inorg. Chem.</i> , 2010,<br><b>49</b> , 3101                                                   |
| empirical formula                                               | C <sub>172</sub> H <sub>252</sub> Co <sub>1</sub> Cu <sub>12</sub> N <sub>100</sub> O <sub>1</sub> W <sub>8</sub> | C <sub>172</sub> H <sub>252</sub> Cu <sub>11.5</sub> N <sub>100</sub> Ni <sub>1.5</sub> O <sub>1</sub> W <sub>8</sub> | C <sub>164</sub> H <sub>302</sub> Cu <sub>13</sub> N <sub>92</sub> O <sub>25</sub> W <sub>7</sub> |
| formula weight                                                  | 6028.93                                                                                                           | 6026.30                                                                                                               | 6076.01                                                                                           |
| <i>T</i> , K                                                    | 100(2)                                                                                                            | 100(2)                                                                                                                | 291(2)                                                                                            |
| radiation                                                       | synchrotron ( $\lambda = 0.77538 \text{ \AA}$ )                                                                   | synchrotron ( $\lambda = 0.77538 \text{ \AA}$ )                                                                       | MoK $\alpha$ ( $\lambda = 0.71073 \text{ \AA}$ )                                                  |
| crystal system                                                  | orthorhombic                                                                                                      | orthorhombic                                                                                                          | tetragonal                                                                                        |
| space group                                                     | <i>P</i> 2 <sub>1</sub> 2 <sub>1</sub> 2<br>chiral                                                                | <i>P</i> 2 <sub>1</sub> 2 <sub>1</sub> 2<br>chiral                                                                    | <i>I</i> 4mm<br>non-centrosymmetric<br>(non-chiral)                                               |
| <i>a</i> , $\text{\AA}$                                         | 32.2076(3)                                                                                                        | 32.3884(3)                                                                                                            | 31.2762(12)                                                                                       |
| <i>b</i> , $\text{\AA}$                                         | 29.6713(4)                                                                                                        | 29.3119(5)                                                                                                            | 31.2762(12)                                                                                       |
| <i>c</i> , $\text{\AA}$                                         | 16.1270(2)                                                                                                        | 16.0224(3)                                                                                                            | 16.1133(18)                                                                                       |
| $\alpha, \beta, \gamma$ , deg                                   | 90                                                                                                                | 90                                                                                                                    | 90                                                                                                |
| <i>V</i> , $\text{\AA}^3$                                       | 15411.6(3)                                                                                                        | 15211.1(4)                                                                                                            | 15762(2)                                                                                          |
| <i>Z</i>                                                        | 2                                                                                                                 | 2                                                                                                                     | 2                                                                                                 |
| $\rho_{\text{calc}}$ , g/cm <sup>3</sup>                        | 1.299                                                                                                             | 1.316                                                                                                                 | 1.280                                                                                             |
| qbs. coefficient, cm <sup>-1</sup>                              | 4.841                                                                                                             | 4.910                                                                                                                 | 3.454                                                                                             |
| <i>F</i> (000)                                                  | 5918                                                                                                              | 5919                                                                                                                  | 6050                                                                                              |
| crystal type                                                    | dark violet needle                                                                                                | dark violet needle                                                                                                    | blue block                                                                                        |
| crystal size, mm <sup>3</sup>                                   | 0.13 × 0.06 × 0.03                                                                                                | 0.11 × 0.05 × 0.03                                                                                                    | 0.28 × 0.22 × 0.20                                                                                |
| $\theta$ range, deg                                             | 1.541 to 27.484                                                                                                   | 1.547 to 28.986                                                                                                       | 1.840 to 25.990                                                                                   |
| index range                                                     | -35 ≤ <i>h</i> ≤ 38,<br>-32 ≤ <i>k</i> ≤ 35,<br>-19 ≤ <i>l</i> ≤ 19                                               | -40 ≤ <i>h</i> ≤ 40,<br>-36 ≤ <i>k</i> ≤ 35,<br>-20 ≤ <i>l</i> ≤ 19                                                   | -38 ≤ <i>h</i> ≤ 31,<br>-36 ≤ <i>k</i> ≤ 38,<br>-19 ≤ <i>l</i> ≤ 19                               |
| reflections collected                                           | 66555                                                                                                             | 74617                                                                                                                 | 43299                                                                                             |
| independent reflections                                         | 26999                                                                                                             | 29846                                                                                                                 | 8220                                                                                              |
| <i>R</i> <sub>int</sub>                                         | 0.0581                                                                                                            | 0.0428                                                                                                                | 0.0768                                                                                            |
| completeness                                                    | 0.998                                                                                                             | 0.972                                                                                                                 | 0.998                                                                                             |
| data/restraints/<br>parameters                                  | 26999/368/1343                                                                                                    | 29846/835/1344                                                                                                        | 8220/1/511                                                                                        |
| goodness-of-fit on <i>F</i> <sup>2</sup>                        | 1.118                                                                                                             | 1.231                                                                                                                 | 1.014                                                                                             |
| final <i>R</i> indices<br>[ <i>I</i> ≥ 2 $\sigma$ ( <i>I</i> )] | <i>R</i> <sub>1</sub> = 0.0838, <i>wR</i> <sub>2</sub> = 0.2383                                                   | <i>R</i> <sub>1</sub> = 0.0949, <i>wR</i> <sub>2</sub> = 0.2964                                                       | <i>R</i> <sub>1</sub> = 0.0532, <i>wR</i> <sub>2</sub> = 0.1097                                   |
| <i>R</i> indices (all data)                                     | <i>R</i> <sub>1</sub> = 0.0918, <i>wR</i> <sub>2</sub> = 0.2474                                                   | <i>R</i> <sub>1</sub> = 0.1058, <i>wR</i> <sub>2</sub> = 0.3080                                                       | <i>R</i> <sub>1</sub> = 0.0658, <i>wR</i> <sub>2</sub> = 0.1123                                   |
| largest diff. peak/hole,<br>e <sup>-</sup> · $\text{\AA}^{-3}$  | 3.727/−3.539                                                                                                      | 2.966/−3.521                                                                                                          | 1.727/−1.894                                                                                      |
| Flack parameter                                                 | 0.022(9)                                                                                                          | 0.308(11)                                                                                                             | 0.010(11)                                                                                         |

**Table S3.** Detailed structural parameters of 3d metal complexes in **1** and **2** compared with the previously reported analogous  $\{[\text{Cu}^{\text{II}}_{13}(\text{Me}_3\text{tacn})_{12}(\text{H}_2\text{O})][\text{W}^{\text{IV}}(\text{CN})_8]_5[\text{W}^{\text{V}}(\text{CN})_8]_2\} \cdot 24\text{H}_2\text{O}$  (**Cu<sub>13</sub>W<sub>7</sub>**) compound.

| parameter       | <b>1</b>                                                | <b>2</b>                                                | <b>Cu<sub>13</sub>W<sub>7</sub></b>                                                    |
|-----------------|---------------------------------------------------------|---------------------------------------------------------|----------------------------------------------------------------------------------------|
|                 | this work<br>(atom labels as in Fig. 1b<br>and Fig. 3a) | this work<br>(atom labels as in Fig. 1b<br>and Fig. 3a) | <i>Inorg. Chem.</i> , 2010,<br>49, 3101 (bond distances<br>of the analogous complexes) |
| Co1/Ni1/Cu1–N2  | 2.27(3) Å                                               | 2.27(2) Å                                               | Cu3, 2.297(10) Å                                                                       |
| Co1/Ni1/Cu1–N82 | 2.23(2) Å                                               | 2.23(3) Å                                               | 2.251(9) Å                                                                             |
| Co1/Ni1/Cu1–N12 | 2.049(19) Å                                             | 2.03(3) Å                                               | 2.000(6) Å                                                                             |
| Co1/Ni1/Cu1–N21 | 2.00(2) Å                                               | 2.054(19) Å                                             | 2.000(6) Å                                                                             |
| Co1/Ni1/Cu1–N81 | 2.195(18) Å                                             | 2.13(3) Å                                               | 2.113(6) Å                                                                             |
| Co1/Ni1/Cu1–N83 | 2.12(2) Å                                               | 2.14(3) Å                                               | 2.113(6) Å                                                                             |
| Co2/Ni2/Cu2–N13 | 2.21(2) Å                                               | 2.24(2) Å                                               | Cu2, <sup>a</sup> 2.249(19) Å                                                          |
| Co2/Ni2/Cu2–N62 | 2.31(2) Å                                               | 2.33(4) Å                                               | 2.292(11) Å                                                                            |
| Co2/Ni2/Cu2–N10 | 1.993(18) Å                                             | 2.00(2) Å                                               | 1.969(6) Å                                                                             |
| Co2/Ni2/Cu2–N26 | 1.993(16) Å                                             | 2.05(2) Å                                               | 1.969(6) Å                                                                             |
| Co2/Ni2/Cu2–N61 | 2.16(3) Å                                               | 2.05(4) Å                                               | 2.047(6) Å                                                                             |
| Co2/Ni2/Cu2–N63 | 2.06(3) Å                                               | 2.15(4) Å                                               | 2.047(6) Å                                                                             |
| Cu3–N1          | 2.42(2) Å                                               | 2.34(2) Å                                               | Cu3, 2.297(10) Å                                                                       |
| Cu3–N41         | 2.35(2) Å                                               | 2.31(3) Å                                               | 2.251(9) Å                                                                             |
| Cu3–N6          | 1.972(18) Å                                             | 2.00(2) Å                                               | 2.000(6) Å                                                                             |
| Cu3–N22         | 1.93(2) Å                                               | 1.98(2) Å                                               | 2.000(6) Å                                                                             |
| Cu3–N42         | 2.132(19) Å                                             | 2.05(2) Å                                               | 2.113(6) Å                                                                             |
| Cu3–N43         | 2.094(18) Å                                             | 2.08(2) Å                                               | 2.113(6) Å                                                                             |
| Cu4–N5          | 1.951(15) Å                                             | 1.999(15) Å                                             | Cu1, 1.947(9) Å                                                                        |
| Cu4–N5'         | 1.951(15) Å                                             | 1.999(15) Å                                             | 1.947(9) Å                                                                             |
| Cu4–N23         | 1.975(16) Å                                             | 1.98(2) Å                                               | 1.947(9) Å                                                                             |
| Cu4–N23'        | 1.975(16) Å                                             | 1.98(2) Å                                               | 1.947(9) Å                                                                             |
| Cu4–O1          | 2.30(3) Å                                               | 2.32(3) Å                                               | 2.365(16) Å                                                                            |
| Cu5–N20         | 1.967(19) Å                                             | 2.05(3) Å                                               | Cu4, 1.964(14) Å                                                                       |
| Cu5–N27         | 1.939(19) Å                                             | 2.008(19) Å                                             | 1.930(7) Å                                                                             |
| Cu5–N71         | 2.19(4) Å                                               | 2.21(5) Å                                               | 2.241(14) Å                                                                            |
| Cu5–N72         | 2.03(3) Å                                               | 2.15(4) Å                                               | 1.998(13) Å                                                                            |
| Cu5–N73         | 2.09(2) Å                                               | 2.14(4) Å                                               | 2.116(12) Å                                                                            |
| Cu6–N7          | 1.981(19) Å                                             | 2.02(2) Å                                               | Cu2, <sup>a</sup> 1.969(6) Å                                                           |
| Cu6–N24         | 1.979(16) Å                                             | 1.94(2) Å                                               | 1.969(6) Å                                                                             |
| Cu6–N51         | 2.20(2) Å                                               | 2.21(4) Å                                               | 2.292(11) Å                                                                            |
| Cu6–N52         | 2.10(3) Å                                               | 2.06(4) Å                                               | 2.047(6) Å                                                                             |
| Cu6–N53         | 2.09(2) Å                                               | 2.09(4) Å                                               | 2.047(6) Å                                                                             |
| Cu7–N11         | 1.972(18) Å                                             | 1.987(16) Å                                             | Cu4, 1.930(7) Å                                                                        |
| Cu7–N14         | 1.96(2) Å                                               | 1.98(2) Å                                               | 1.964(14) Å                                                                            |
| Cu7–N91         | 2.18(3) Å                                               | 2.22(4) Å                                               | 2.241(14) Å                                                                            |
| Cu7–N92         | 2.08(3) Å                                               | 2.21(4) Å                                               | 2.116(12) Å                                                                            |
| Cu7–N93         | 2.06(3) Å                                               | 2.09(3) Å                                               | 1.998(13) Å                                                                            |

<sup>a</sup>Due to the symmetry and partial occupancies for the part of {Cu<sub>13</sub>W<sub>7</sub>} cluster, Cu2 centre represents six- and five-coordinated complexes with half occupancies.

**Table S4.** Detailed structural parameters of  $[\text{W}(\text{CN})_8]^{n-}$  complexes in **1** and **2** compared with the previously reported analogous  $\{[\text{Cu}^{\text{II}}_{13}(\text{Me}_3\text{tacn})_{12}(\text{H}_2\text{O})][\text{W}^{\text{IV}}(\text{CN})_8]_5[\text{W}^{\text{V}}(\text{CN})_8]_2\} \cdot 24\text{H}_2\text{O}$  (**Cu<sub>13</sub>W<sub>7</sub>**) compound.

| parameter | <b>1</b>              | <b>2</b>           | <b>Cu<sub>13</sub>W<sub>7</sub></b>                                                      |
|-----------|-----------------------|--------------------|------------------------------------------------------------------------------------------|
|           | this work             | this work          | <i>Inorg. Chem.</i> , 2010, <b>49</b> , 3101 (bond distances of the analogous complexes) |
| W1–C1     | 2.08(3) Å             | 2.18(3) Å          | W2, 2.161(13) Å                                                                          |
| W1–C2     | 2.15(3) Å             | 2.20(2) Å          | 2.188(11) Å                                                                              |
| W1–C3     | 2.192(19) Å           | 2.19(4) Å          | -                                                                                        |
| W1–C4     | 2.20(2) Å             | 2.12(2) Å          | -                                                                                        |
| W2–C5     | 2.247(19) Å           | 2.14(3) Å          | W1, 2.123(8) Å                                                                           |
| W2–C6     | 2.15(2) Å             | 2.07(2) Å          | 2.137(11) Å                                                                              |
| W2–C7     | 2.252(19) Å           | 2.25(3) Å          | 2.156(8) Å                                                                               |
| W2–C8     | 2.17(3) Å             | 2.161(18) Å        | 2.160(8) Å                                                                               |
| W2–C9     | 2.22(2) Å             | 2.09(3) Å          | 2.187(12) Å                                                                              |
| W2–C10    | 2.210(18) Å           | 2.21(2) Å          | -                                                                                        |
| W2–C11    | 2.15(2) Å             | 2.214(19) Å        | -                                                                                        |
| W2–C12    | 2.145(18) Å           | 2.12(2) Å          | -                                                                                        |
| W3–C13    | 2.08(3) Å             | 2.17(2) Å          | W3, 2.13(2) Å                                                                            |
| W3–C14    | 2.13(3) Å             | 2.23(3) Å          | 2.143(18) Å                                                                              |
| W3–C15    | 2.15(2) Å             | 2.24(4) Å          | 2.18(2) Å                                                                                |
| W3–C16    | 2.14(3) Å             | 2.10(2) Å          | 2.187(18) Å                                                                              |
| W3–C17    | 2.23(2) Å             | 2.15(3) Å          | 2.192(17) Å                                                                              |
| W3–C18    | 2.21(2) Å             | 2.19(2) Å          | -                                                                                        |
| W3–C19    | 2.08(2) Å             | 2.14(3) Å          | -                                                                                        |
| W3–C20    | 2.13(2) Å             | 2.17(2) Å          | -                                                                                        |
| W4–C21    | 2.14(2) Å             | 2.20(3) Å          | W1, 2.123(8) Å                                                                           |
| W4–C22    | 2.158(18) Å           | 2.08(3) Å          | 2.137(11) Å                                                                              |
| W4–C23    | 2.24(2) Å             | 2.232(14) Å        | 2.156(8) Å                                                                               |
| W4–C24    | 2.213(16) Å           | 2.18(2) Å          | 2.160(8) Å                                                                               |
| W4–C25    | 2.218(17) Å           | 2.25(3) Å          | 2.187(12) Å                                                                              |
| W4–C26    | 2.225(16) Å           | 2.18(2) Å          | -                                                                                        |
| W4–C27    | 2.15(3) Å             | 2.127(18) Å        | -                                                                                        |
| W4–C28    | 2.14(2) Å             | 2.15(2) Å          | -                                                                                        |
| W5–C29    | 2.19(2)               | 2.18(2) Å          | -                                                                                        |
| W5–C30    | 2.156(19)             | 2.15(3) Å          | -                                                                                        |
| W5–C31    | 2.19(2)               | 2.18(2) Å          | -                                                                                        |
| W5–C32    | 2.15(2)               | 2.14(2) Å          | -                                                                                        |
| W1–CN     | 173(2)° to 178(2)°    | 167(3)° to 175(2)° | 179.5(11)° to 179.9(10)°                                                                 |
| W2–CN     | 171.5(17)° to 179(2)° | 167(3)° to 179(2)° | 170.5(10)° to 177.9(7)°                                                                  |
| W3–CN     | 172.7(18)° to 179(3)° | 163(3)° to 177(2)° | 171.6(14)° to 180(2)°                                                                    |
| W4–CN     | 170.4(16)° to 180(2)° | 164(2)° to 178(2)° | 170.5(10)° to 177.9(7)°                                                                  |
| W5–CN     | 163(3)° to 176(6)°    | 167(7)° to 176(4)° | -                                                                                        |

**Table S5.** Results of Continuous Shape Measure (CSM) analysis for metal complexes in **1** and **2**.

| compound, metal complex                                                           | CSM parameters <sup>a</sup> |        |        | geometry    |
|-----------------------------------------------------------------------------------|-----------------------------|--------|--------|-------------|
| six-coordinated metal complexes                                                   |                             |        |        |             |
| -                                                                                 | OC-6                        | TPR-6  | -      | -           |
| <b>1</b> , [Co1/Cu1( $\mu$ -NC) <sub>3</sub> (Me <sub>3</sub> tacn)] <sup>-</sup> | 0.533                       | 15.249 | -      | OC-6        |
| <b>2</b> , [Ni1/Cu1( $\mu$ -NC) <sub>3</sub> (Me <sub>3</sub> tacn)] <sup>-</sup> | 0.512                       | 15.199 | -      | OC-6        |
| <b>1</b> , [Co2/Cu2( $\mu$ -NC) <sub>3</sub> (Me <sub>3</sub> tacn)] <sup>-</sup> | 0.406                       | 15.233 | -      | OC-6        |
| <b>2</b> , [Ni2/Cu2( $\mu$ -NC) <sub>3</sub> (Me <sub>3</sub> tacn)] <sup>-</sup> | 0.505                       | 14.839 | -      | OC-6        |
| <b>1</b> , [Cu3( $\mu$ -NC) <sub>3</sub> (Me <sub>3</sub> tacn)] <sup>-</sup>     | 0.406                       | 15.233 | -      | OC-6        |
| <b>2</b> , [Cu3( $\mu$ -NC) <sub>3</sub> (Me <sub>3</sub> tacn)] <sup>-</sup>     | 0.658                       | 16.190 | -      | OC-6        |
| five-coordinated metal complexes                                                  |                             |        |        |             |
| -                                                                                 | vOC-5                       | SPY-5  | -      | -           |
| <b>1</b> , [Cu4( $\mu$ -NC) <sub>4</sub> (H <sub>2</sub> O)] <sup>2-</sup>        | 0.770                       | 0.519  | -      | SPY-5       |
| <b>2</b> , [Cu4( $\mu$ -NC) <sub>4</sub> (H <sub>2</sub> O)] <sup>2-</sup>        | 0.729                       | 0.567  | -      | SPY-5       |
| <b>1</b> , [Cu5( $\mu$ -NC) <sub>2</sub> (Me <sub>3</sub> tacn)]                  | 0.902                       | 0.891  | -      | vOC-5/SPY-5 |
| <b>2</b> , [Cu5( $\mu$ -NC) <sub>2</sub> (Me <sub>3</sub> tacn)]                  | 0.952                       | 1.158  | -      | vOC-5/SPY-5 |
| <b>1</b> , [Cu6( $\mu$ -NC) <sub>2</sub> (Me <sub>3</sub> tacn)]                  | 0.429                       | 1.404  | -      | vOC-5       |
| <b>2</b> , [Cu6( $\mu$ -NC) <sub>2</sub> (Me <sub>3</sub> tacn)]                  | 0.427                       | 1.453  | -      | vOC-5       |
| <b>1</b> , [Cu7( $\mu$ -NC) <sub>2</sub> (Me <sub>3</sub> tacn)]                  | 0.752                       | 1.383  | -      | vOC-5       |
| <b>2</b> , [Cu7( $\mu$ -NC) <sub>2</sub> (Me <sub>3</sub> tacn)]                  | 0.653                       | 1.389  | -      | vOC-5       |
| eight-coordinated metal complexes                                                 |                             |        |        |             |
| -                                                                                 | SAPR-8                      | TDD-8  | BTPR-8 | -           |
| <b>1</b> , [W1(CN) <sub>8</sub> ] <sup>n-</sup>                                   | 0.103                       | 2.540  | 1.783  | SAPR-8      |
| <b>2</b> , [W1(CN) <sub>8</sub> ] <sup>n-</sup>                                   | 0.179                       | 2.347  | 2.209  | SAPR-8      |
| <b>1</b> , [W2(CN) <sub>8</sub> ] <sup>n-</sup>                                   | 0.252                       | 2.028  | 1.977  | SAPR-8      |
| <b>2</b> , [W2(CN) <sub>8</sub> ] <sup>n-</sup>                                   | 0.440                       | 2.153  | 2.307  | SAPR-8      |
| <b>1</b> , [W3(CN) <sub>8</sub> ] <sup>n-</sup>                                   | 0.360                       | 2.165  | 1.479  | SAPR-8      |
| <b>2</b> , [W3(CN) <sub>8</sub> ] <sup>n-</sup>                                   | 0.343                       | 2.254  | 1.828  | SAPR-8      |
| <b>1</b> , [W4(CN) <sub>8</sub> ] <sup>n-</sup>                                   | 0.416                       | 1.468  | 1.759  | SAPR-8      |
| <b>2</b> , [W4(CN) <sub>8</sub> ] <sup>n-</sup>                                   | 0.637                       | 1.426  | 1.632  | SAPR-8      |
| <b>1</b> , [W5(CN) <sub>8</sub> ] <sup>n-</sup>                                   | 0.894                       | 1.432  | 2.233  | SAPR-8      |
| <b>2</b> , [W5(CN) <sub>8</sub> ] <sup>n-</sup>                                   | 0.407                       | 2.433  | 2.328  | SAPR-8      |

<sup>a</sup>CSM parameter represents the distortion from an ideal geometry. It equals 0 for an ideal polyhedron and increases with the increasing distortion. Polyhedrons used in calculations: OC-6 = parameter of an octahedron related to the O<sub>h</sub> symmetry; TPR-6 = parameter of a trigonal prism related to the D<sub>3h</sub> symmetry; vOC-5 = parameter of a vacant octahedron related to the C<sub>4v</sub> symmetry; SPY-5 = parameter of a spherical square pyramid related to the D<sub>3h</sub> symmetry; SAPR-8 = parameter of a square antiprism geometry related to the D<sub>4d</sub> symmetry; TDD-8 = parameter of a triangular dodecahedron related to the D<sub>2d</sub> symmetry; BTPR-8 = parameter of a bicapped trigonal prism related to the C<sub>2v</sub> symmetry.

References: (a) M. Llunell, D. Casanova, J. Cirera, J. Bofill, P. Alemany, S. Alvarez, M. Pinsky and D. Avnir, *SHAPE v. 2.1. Program for the Calculation of Continuous Shape Measures of Polygonal and Polyhedral Molecular Fragments*, University of Barcelona: Barcelona, Spain, 2013; (b) D. Casanova, J. Cirera, M. Llunell, P. Alemany, D. Avnir and S. Alvarez, *J. Am. Chem. Soc.*, 2004, **126**, 1755.



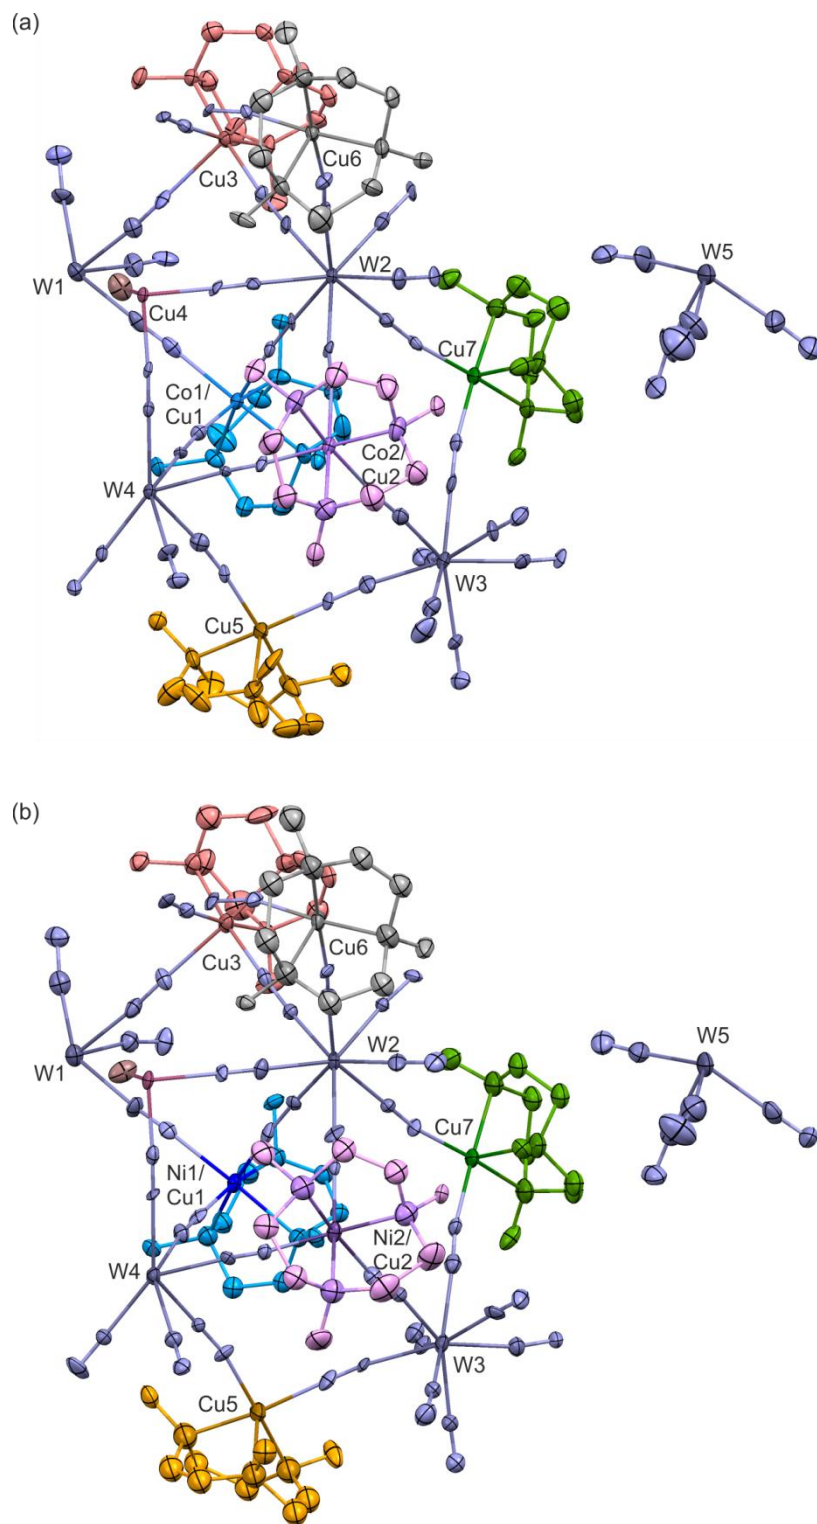

**Figure S1.** Comparison of the asymmetric units of **1** (a) and **2** (b) with the metal atoms labelling schemes. Thermal ellipsoids are presented at the 20% probability level. The detailed labelling scheme for the nitrogen atoms coordinated to Cu/Co metal centres in **1** is gathered in Figure 1b. The related bond lengths and angles are collected in Table S3. Hydrogen atoms are omitted for clarity.

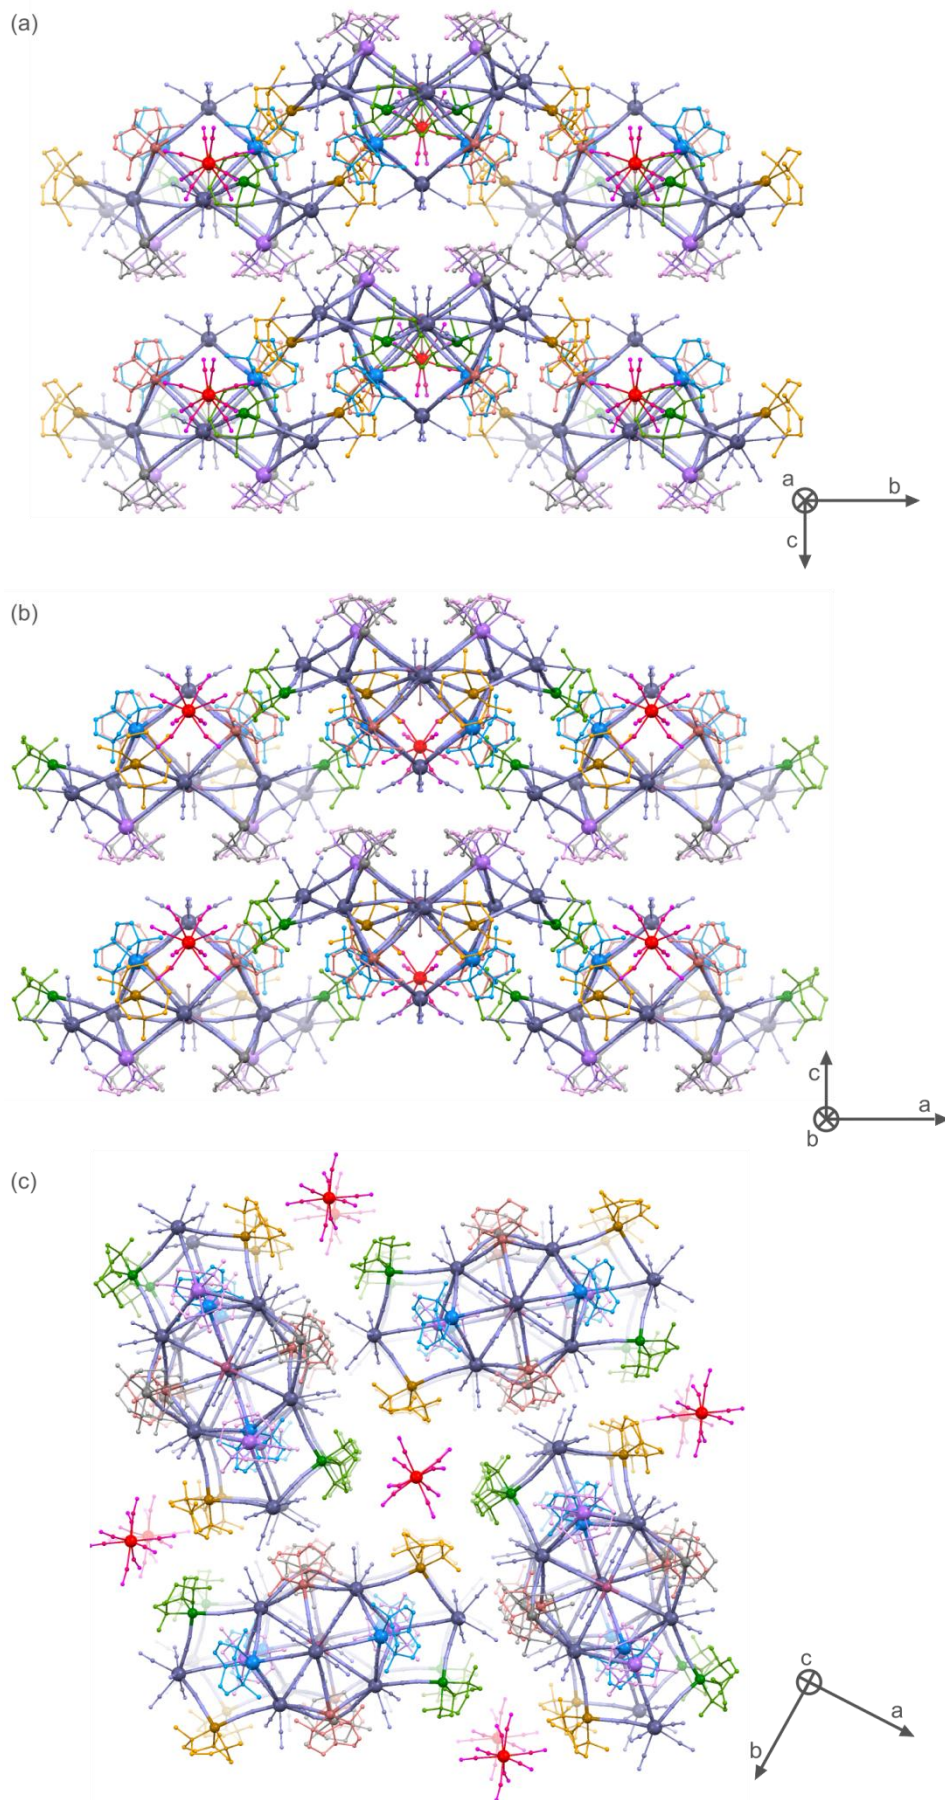

**Figure S2.** Views of the supramolecular network of **1** shown along the crystallographic *a* axis (a), *b* axis (b) and *c* axis (c). Atoms of clusters are coloured in the identical way as shown in Figure S1 while the non-coordinated  $[\text{W}(\text{CN})_8]^{3-}$  ions are shown in red–magenta colours.

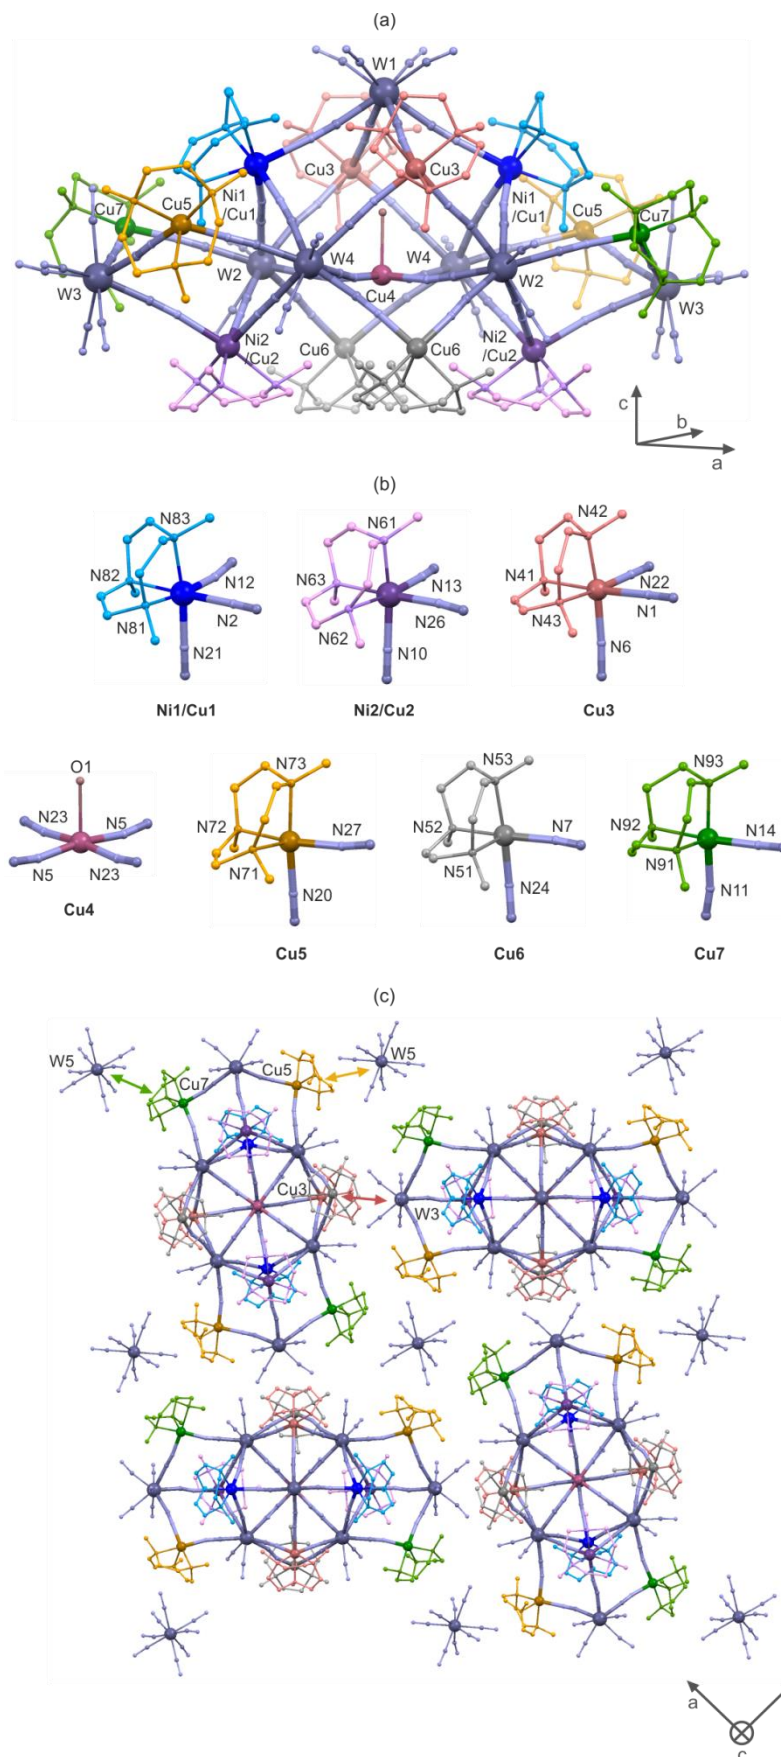

**Figure S3.** Crystal structure of **2**: views on the coordination skeleton of  $\{\text{Ni}_{1.5}\text{Cu}_{11.5}\text{W}_7\}^{3+}$  clusters (a), detailed views on intracuster Ni and Cu complexes (b), and the supramolecular arrangement of clusters and uncoordinated  $[\text{W}(\text{CN})_8]^{3-}$  ions within *ab* crystallographic plane with the indication of the related shortest intermetallic contacts, Cu7–W5 of ca. 7.19 Å, Cu5–W5 of ca. 7.73 Å and Cu3–W3 of ca. 7.69 Å. Black arrows in (b) represent the axial elongation of the pseudo-octahedral 3d metal complexes.

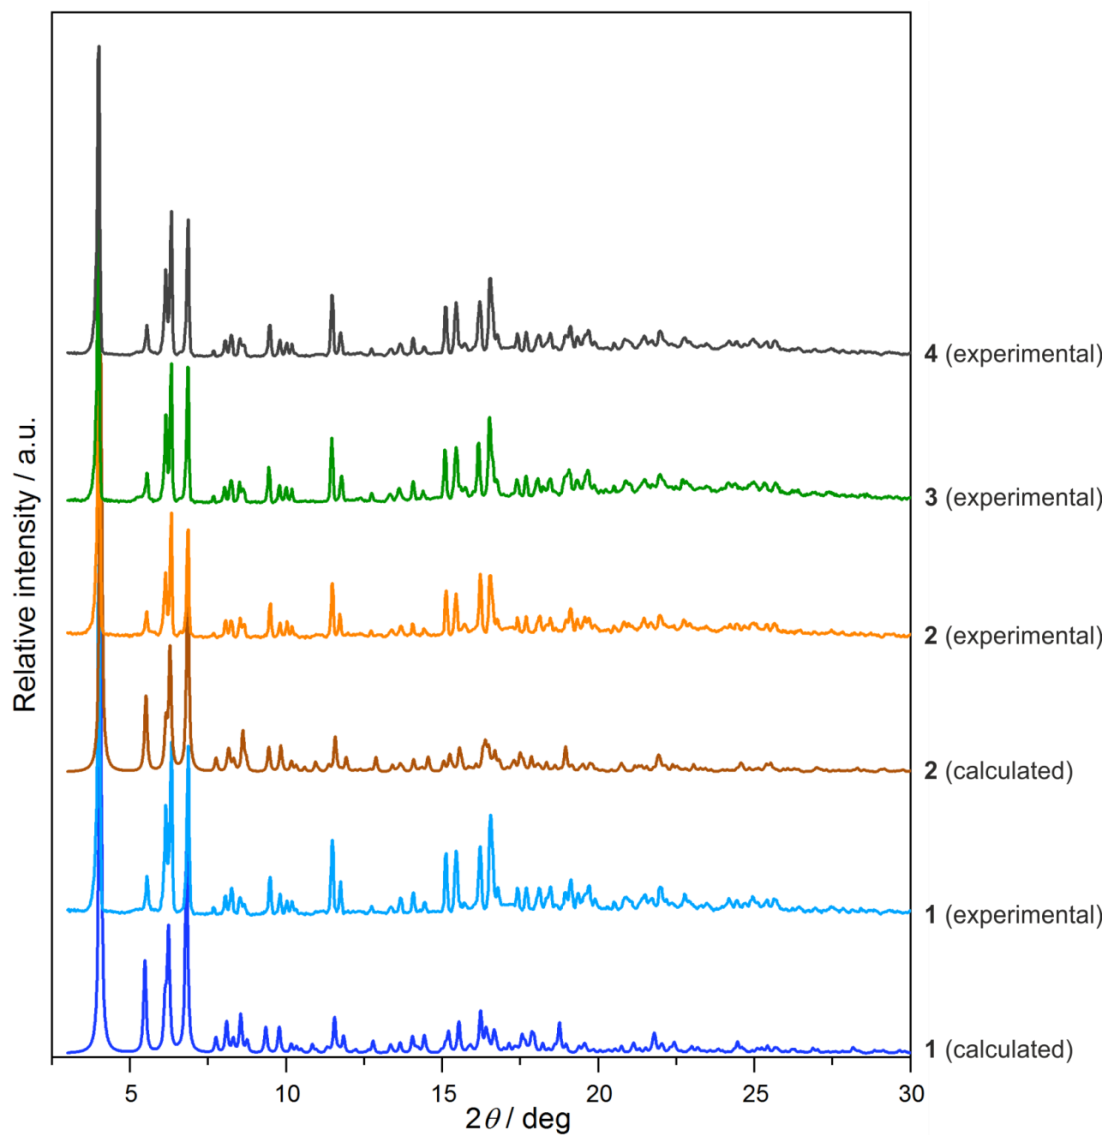

**Figure S4.** Experimental powder X-ray diffraction (PXRD) patterns of compounds **1–4** compared with the PXRD patterns calculated from the structural models of **1** and **2** obtained within the single-crystal X-ray diffraction structural analyses.

**Table S6.** Crystal data and structure refinement for **5** compared with the previously reported analogous  $\{\text{Cu}^{\text{II}}[\text{Cu}^{\text{II}}(\text{Me}_3\text{tacn})]_8[\text{W}^{\text{V}}(\text{CN})_8]_6\} \cdot 5\text{MeOH} \cdot 31\text{H}_2\text{O}$  (**Cu<sub>9</sub>W<sub>6</sub>**) compound.

| compound                                                        | <b>5</b>                                                                                                         | <b>Cu<sub>9</sub>W<sub>6</sub></b>                                                               |
|-----------------------------------------------------------------|------------------------------------------------------------------------------------------------------------------|--------------------------------------------------------------------------------------------------|
|                                                                 | this work                                                                                                        | <i>Inorg. Chem.</i> , 2015,<br><b>54</b> , 11049                                                 |
| empirical formula                                               | C <sub>138</sub> H <sub>168</sub> Co <sub>1</sub> Cu <sub>8</sub> N <sub>72</sub> O <sub>18</sub> W <sub>6</sub> | C <sub>120</sub> H <sub>168</sub> Cu <sub>9</sub> N <sub>72</sub> O <sub>36</sub> W <sub>6</sub> |
| formula weight                                                  | 4793.78                                                                                                          | 4294.22                                                                                          |
| <i>T</i> , K                                                    | 100(2)                                                                                                           | 173(2)                                                                                           |
| radiation                                                       | MoK $\alpha$ ( $\lambda = 0.71073$ Å)                                                                            | MoK $\alpha$ ( $\lambda = 0.71073$ Å)                                                            |
| crystal system                                                  | triclinic                                                                                                        | monoclinic                                                                                       |
| space group                                                     | <i>P</i> $\bar{1}$                                                                                               | <i>P</i> 2 <sub>1</sub> /n                                                                       |
| <i>a</i> , Å                                                    | 17.5625(7)                                                                                                       | 17.796(3)                                                                                        |
| <i>b</i> , Å                                                    | 17.6025(8)                                                                                                       | 17.665(3)                                                                                        |
| <i>c</i> , Å                                                    | 17.9412(7)                                                                                                       | 28.230(4)                                                                                        |
| $\alpha$ , deg                                                  | 96.994(7)                                                                                                        | 90                                                                                               |
| $\beta$ , deg                                                   | 104.782(7)                                                                                                       | 91.778(2)                                                                                        |
| $\gamma$ , deg                                                  | 109.072(8)                                                                                                       | 90                                                                                               |
| <i>V</i> , Å <sup>3</sup>                                       | 4939.1(5)                                                                                                        | 8870(2)                                                                                          |
| <i>Z</i>                                                        | 1                                                                                                                | 2                                                                                                |
| $\rho_{\text{calc}}$ , g/cm <sup>3</sup>                        | 1.612                                                                                                            | 1.608                                                                                            |
| qbs. coefficient, cm <sup>-1</sup>                              | 4.469                                                                                                            | 4.985                                                                                            |
| <i>F</i> (000)                                                  | 2347                                                                                                             | 4194                                                                                             |
| crystal type                                                    | violet block                                                                                                     | black block                                                                                      |
| crystal size, mm <sup>3</sup>                                   | 0.13 × 0.12 × 0.08                                                                                               | 0.22 × 0.20 × 0.18                                                                               |
| $\theta$ range, deg                                             | 3.001 to 27.485                                                                                                  | 1.330 to 25.000                                                                                  |
| index range                                                     | -22 ≤ <i>h</i> ≤ 22,<br>-22 ≤ <i>k</i> ≤ 22,<br>-21 ≤ <i>l</i> ≤ 23                                              | -19 ≤ <i>h</i> ≤ 21,<br>-20 ≤ <i>k</i> ≤ 20,<br>-33 ≤ <i>l</i> ≤ 17                              |
| reflections collected                                           | 68489                                                                                                            | 46330                                                                                            |
| independent reflections                                         | 22136                                                                                                            | 15226                                                                                            |
| <i>R</i> <sub>int</sub>                                         | 0.1043                                                                                                           | 0.0579                                                                                           |
| completeness                                                    | 0.977                                                                                                            | 0.975                                                                                            |
| data/restraints/<br>parameters                                  | 22136/135/1186                                                                                                   | 15226/314/1263                                                                                   |
| goodness-of-fit on <i>F</i> <sup>2</sup>                        | 1.090                                                                                                            | 1.040                                                                                            |
| final <i>R</i> indices<br>[ <i>I</i> ≥ 2 $\sigma$ ( <i>I</i> )] | <i>R</i> <sub>1</sub> = 0.1099, <i>wR</i> <sub>2</sub> = 0.2699                                                  | <i>R</i> <sub>1</sub> = 0.0448, <i>wR</i> <sub>2</sub> = 0.1196                                  |
| <i>R</i> indices (all data)                                     | <i>R</i> <sub>1</sub> = 0.1412, <i>wR</i> <sub>2</sub> = 0.2901                                                  | <i>R</i> <sub>1</sub> = 0.0738, <i>wR</i> <sub>2</sub> = 0.1107                                  |
| largest diff. peak/hole,<br>e <sup>-</sup> Å <sup>-3</sup>      | 5.536/−6.024                                                                                                     | 2.176/−1.921                                                                                     |

**Table S7.** Detailed structural parameters of **5** compared with the previously reported analogous  $\{\text{Cu}^{\text{II}}[\text{Cu}^{\text{II}}(\text{Me}_3\text{tacn})]_8[\text{W}^{\text{V}}(\text{CN})_8]_6\} \cdot 5\text{MeOH} \cdot 31\text{H}_2\text{O}$  (**Cu<sub>9</sub>W<sub>6</sub>**) compound.

| parameter | <b>5</b>                                                | <b>Cu<sub>9</sub>W<sub>6</sub></b>                                                                    | parameter | <b>5</b>                                                | <b>Cu<sub>9</sub>W<sub>6</sub></b>                                                                    |
|-----------|---------------------------------------------------------|-------------------------------------------------------------------------------------------------------|-----------|---------------------------------------------------------|-------------------------------------------------------------------------------------------------------|
|           | this work<br>(atom labels as in<br>Fig. 2b and Fig. 3b) | <i>Inorg. Chem.</i> , 2015,<br><b>54</b> , 11049 (bond<br>distances of the<br>analogous<br>complexes) |           | this work<br>(atom labels as in<br>Fig. 2b and Fig. 3b) | <i>Inorg. Chem.</i> , 2015,<br><b>54</b> , 11049 (bond<br>distances of the<br>analogous<br>complexes) |
| Co1–N2    | 2.084(13) Å                                             | Cu1, 1.950(7) Å                                                                                       | W1–CN     | 172.8(13)° to<br>179.0(14)°                             | 175.2(7)° to<br>179.4(7)°                                                                             |
| Co1–N14   | 2.080(12) Å                                             | Cu1, 1.956(6) Å                                                                                       | W2–CN     | 174.6(17)° to<br>179.9(19)°                             | 175.1(7)° to<br>179.0(16)°                                                                            |
| Co1–N17   | 2.054(12) Å                                             | -                                                                                                     | W3–CN     | 172.4(14)° to<br>178.0(15)°                             | 175.8(9)° to<br>179.1(10)°                                                                            |
| Cu1–N8    | 2.059(15) Å                                             | Cu4, 2.015(8) Å                                                                                       | W1–C1     | 2.164(15) Å                                             | 2.174(8) Å                                                                                            |
| Cu1–N13   | 2.291(14) Å                                             | 2.196(8) Å                                                                                            | W1–C2     | 2.154(15) Å                                             | 2.154(10) Å                                                                                           |
| Cu1–N20   | 2.038(14) Å                                             | 2.106(8) Å                                                                                            | W1–C3     | 2.158(15) Å                                             | 2.145(8) Å                                                                                            |
| Cu1–N25   | 2.234(17) Å                                             | 2.192(9) Å                                                                                            | W1–C4     | 2.149(17) Å                                             | 2.142(8) Å                                                                                            |
| Cu1–N26   | 2.127(16) Å                                             | 2.162(8) Å                                                                                            | W1–C5     | 2.124(19) Å                                             | 2.213(10) Å                                                                                           |
| Cu1–N27   | 2.070(16) Å                                             | 2.090(8) Å                                                                                            | W1–C6     | 2.160(17) Å                                             | 2.168(9) Å                                                                                            |
| Cu2–N3    | 2.396(14) Å                                             | Cu3, 2.405(9) Å                                                                                       | W1–C7     | 2.200(19) Å                                             | 2.166(10) Å                                                                                           |
| Cu2–N15   | 2.012(14) Å                                             | 2.004(8) Å                                                                                            | W1–C8     | 2.159(17) Å                                             | 2.159(10) Å                                                                                           |
| Cu2–N18   | 2.012(15) Å                                             | 2.008(7) Å                                                                                            | W2–C9     | 2.177(18) Å                                             | 2.167(9) Å                                                                                            |
| Cu2–N28   | 2.085(15) Å                                             | 2.088(14) Å                                                                                           | W2–C10    | 2.18(2) Å                                               | 2.145(10) Å                                                                                           |
| Cu2–N29   | 2.294(14) Å                                             | 2.279(13) Å                                                                                           | W2–C11    | 2.136(15) Å                                             | 2.147(9) Å                                                                                            |
| Cu2–N30   | 2.075(14) Å                                             | 2.095(11) Å                                                                                           | W2–C12    | 2.148(18) Å                                             | 2.167(9) Å                                                                                            |
| Cu3–N4    | 2.030(13) Å                                             | Cu5, 2.015(8) Å                                                                                       | W2–C13    | 2.160(19) Å                                             | 2.157(9) Å                                                                                            |
| Cu3–N12   | 1.989(13) Å                                             | 1.985(7) Å                                                                                            | W2–C14    | 2.136(19) Å                                             | 2.179(9) Å                                                                                            |
| Cu3–N24   | 2.370(15) Å                                             | 2.472(7) Å                                                                                            | W2–C15    | 2.151(14) Å                                             | 2.144(11) Å                                                                                           |
| Cu3–N31   | 2.114(14) Å                                             | 2.10(2) Å                                                                                             | W2–C16    | 2.098(16) Å                                             | 2.149(13) Å                                                                                           |
| Cu3–N32   | 2.290(15) Å                                             | 2.30(2) Å                                                                                             | W3–C17    | 2.136(16) Å                                             | 2.186(8) Å                                                                                            |
| Cu3–N33   | 2.059(15) Å                                             | 2.05(2) Å                                                                                             | W3–C18    | 2.176(15) Å                                             | 2.170(10) Å                                                                                           |
| Cu4–N1    | 2.000(13) Å                                             | Cu2, 1.978(16) Å                                                                                      | W3–C19    | 2.165(12) Å                                             | 2.170(10) Å                                                                                           |
| Cu4–N16   | 2.381(16) Å                                             | 2.30(2) Å                                                                                             | W3–C20    | 2.148(16) Å                                             | 2.159(9) Å                                                                                            |
| Cu4–N19   | 2.031(14) Å                                             | 2.042(8) Å                                                                                            | W3–C21    | 2.178(16) Å                                             | 2.137(10) Å                                                                                           |
| Cu4–N34   | 2.096(12) Å                                             | 2.072(8) Å                                                                                            | W3–C22    | 2.156(15) Å                                             | 2.172(9) Å                                                                                            |
| Cu4–N35   | 2.298(15) Å                                             | 2.242(15) Å                                                                                           | W3–C23    | 2.16(3) Å                                               | 2.179(10) Å                                                                                           |
| Cu4–N36   | 2.095(11) Å                                             | 2.203(9) Å                                                                                            | W3–C24    | 2.15(2) Å                                               | 2.179(10) Å                                                                                           |

**Table S8.** Results of Continuous Shape Measure (CSM) analysis for six- and eight-coordinated metal complexes in **5**.

| metal complex                                                      | CSM parameters <sup>a</sup> |        |        | geometry      |
|--------------------------------------------------------------------|-----------------------------|--------|--------|---------------|
| six-coordinated metal complexes                                    |                             |        |        |               |
| -                                                                  | OC-6                        | TPR-6  | -      | -             |
| [Co1( $\mu$ -NC) <sub>6</sub> ] <sup>4-</sup>                      | 0.015                       | 16.599 | -      | OC-6          |
| [Cu1( $\mu$ -NC) <sub>3</sub> (Me <sub>3</sub> tacn)] <sup>-</sup> | 0.459                       | 15.656 | -      | OC-6          |
| [Cu2( $\mu$ -NC) <sub>3</sub> (Me <sub>3</sub> tacn)] <sup>-</sup> | 0.740                       | 15.115 | -      | OC-6          |
| [Cu3( $\mu$ -NC) <sub>3</sub> (Me <sub>3</sub> tacn)] <sup>-</sup> | 0.700                       | 15.164 | -      | OC-6          |
| [Cu4( $\mu$ -NC) <sub>3</sub> (Me <sub>3</sub> tacn)] <sup>-</sup> | 0.699                       | 15.821 | -      | OC-6          |
| eight-coordinated metal complexes                                  |                             |        |        |               |
| -                                                                  | SAPR-8                      | TDD-8  | BTPR-8 | -             |
| [W1(CN) <sub>8</sub> ] <sup>3-</sup>                               | 1.356                       | 0.979  | 1.202  | TDD-8         |
| [W2(CN) <sub>8</sub> ] <sup>3-</sup>                               | 1.982                       | 0.362  | 1.923  | TDD-8         |
| [W3(CN) <sub>8</sub> ] <sup>3-</sup>                               | 1.148                       | 1.632  | 1.012  | SAPR-8/BTPR-8 |

<sup>a</sup>CSM parameter represents the distortion from an ideal geometry. It equals 0 for an ideal polyhedron and increases with the increasing distortion. Polyhedrons used in calculations: OC-6 = parameter of an octahedron related to the O<sub>h</sub> symmetry; TPR-6 = parameter of a trigonal prism related to the D<sub>3h</sub> symmetry; SAPR-8 = parameter of a square antiprism geometry related to the D<sub>4d</sub> symmetry; TDD-8 = parameter of a triangular dodecahedron related to the D<sub>2d</sub> symmetry; BTPR-8 = parameter of a bicapped trigonal prism related to the C<sub>2v</sub> symmetry.

References: (a) M. Llunell, D. Casanova, J. Cirera, J. Bofill, P. Alemany, S. Alvarez, M. Pinsky and D. Avnir, *SHAPE v. 2.1. Program for the Calculation of Continuous Shape Measures of Polygonal and Polyhedral Molecular Fragments*, University of Barcelona: Barcelona, Spain, 2013; (b) D. Casanova, J. Cirera, M. Llunell, P. Alemany, D. Avnir and S. Alvarez, *J. Am. Chem. Soc.*, 2004, **126**, 1755.

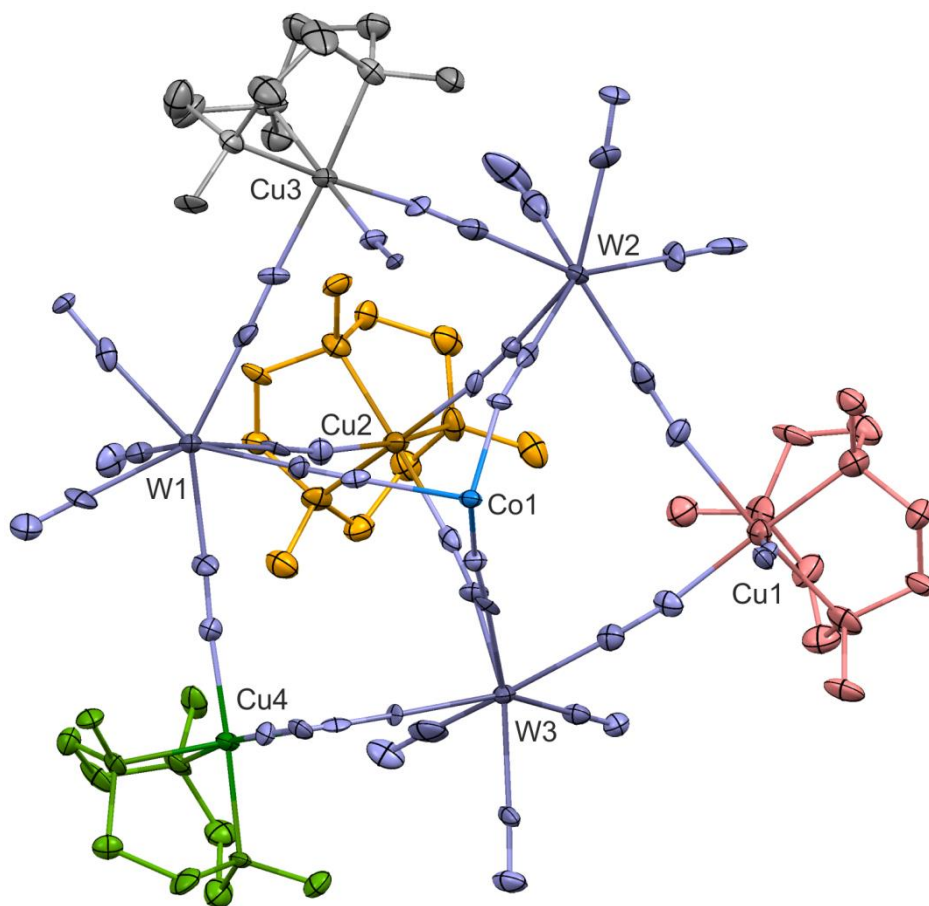

**Figure S5.** View of the asymmetric unit of **5** with the metal atoms labelling schemes. Thermal ellipsoids are presented at the 40% probability level. The detailed labelling scheme for the nitrogen atoms coordinated to Cu/Co metal centres is gathered in Figure 2b. The related bond lengths and angles are collected in Table S6. Hydrogen atoms are omitted for clarity.



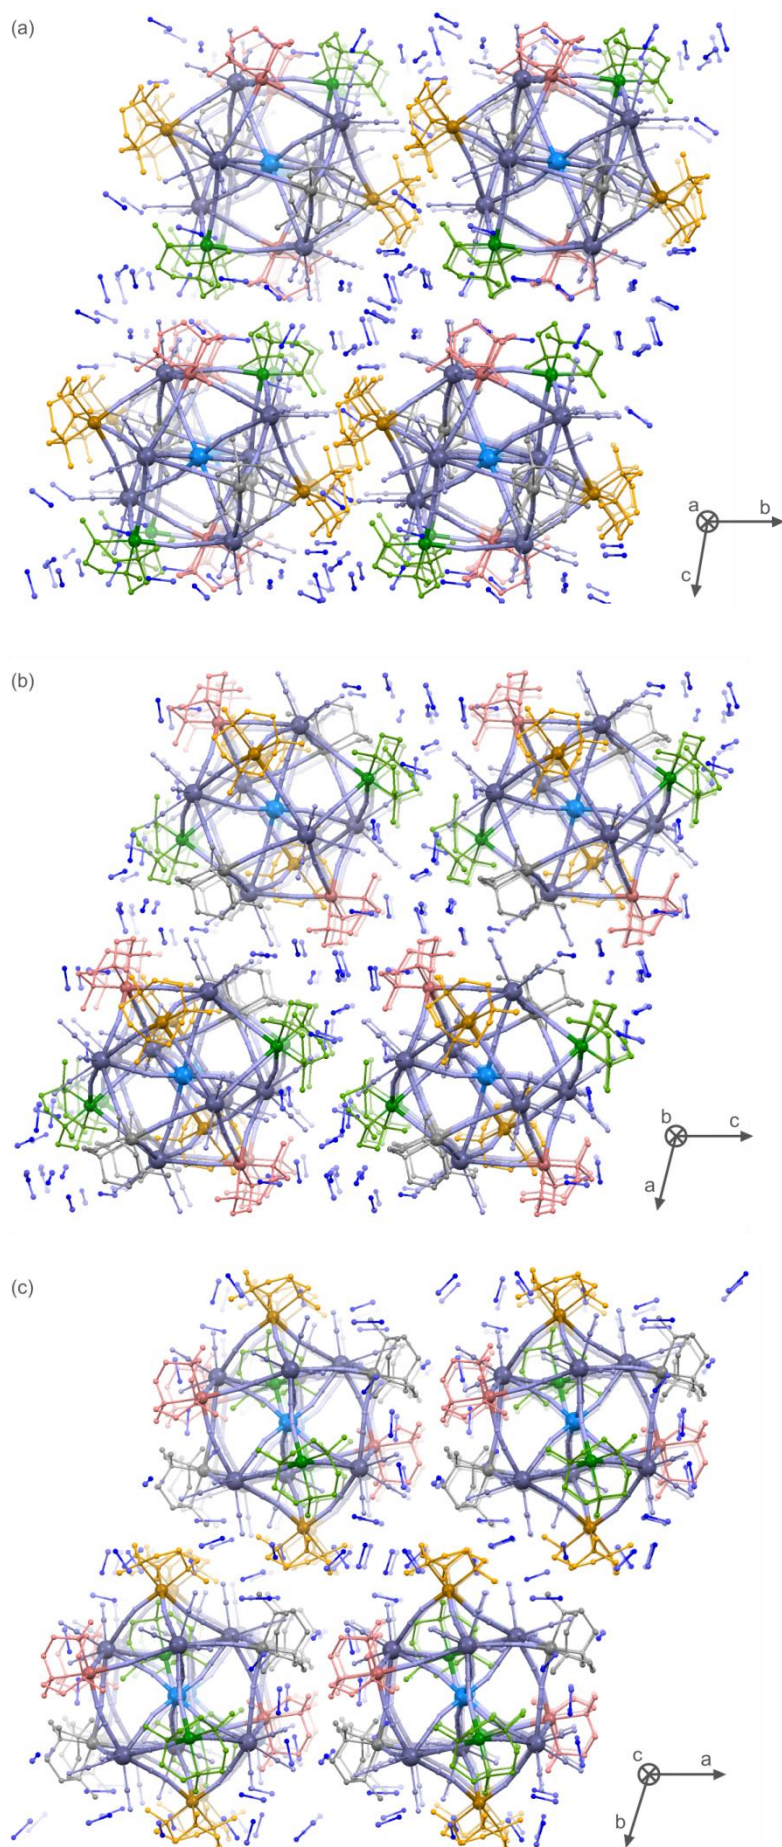

**Figure S6.** Views of the supramolecular network of **5** shown along the crystallographic *a* axis (a), *b* axis (b) and *c* axis (c). Atoms of clusters are coloured in the identical way as shown in Figure S5.

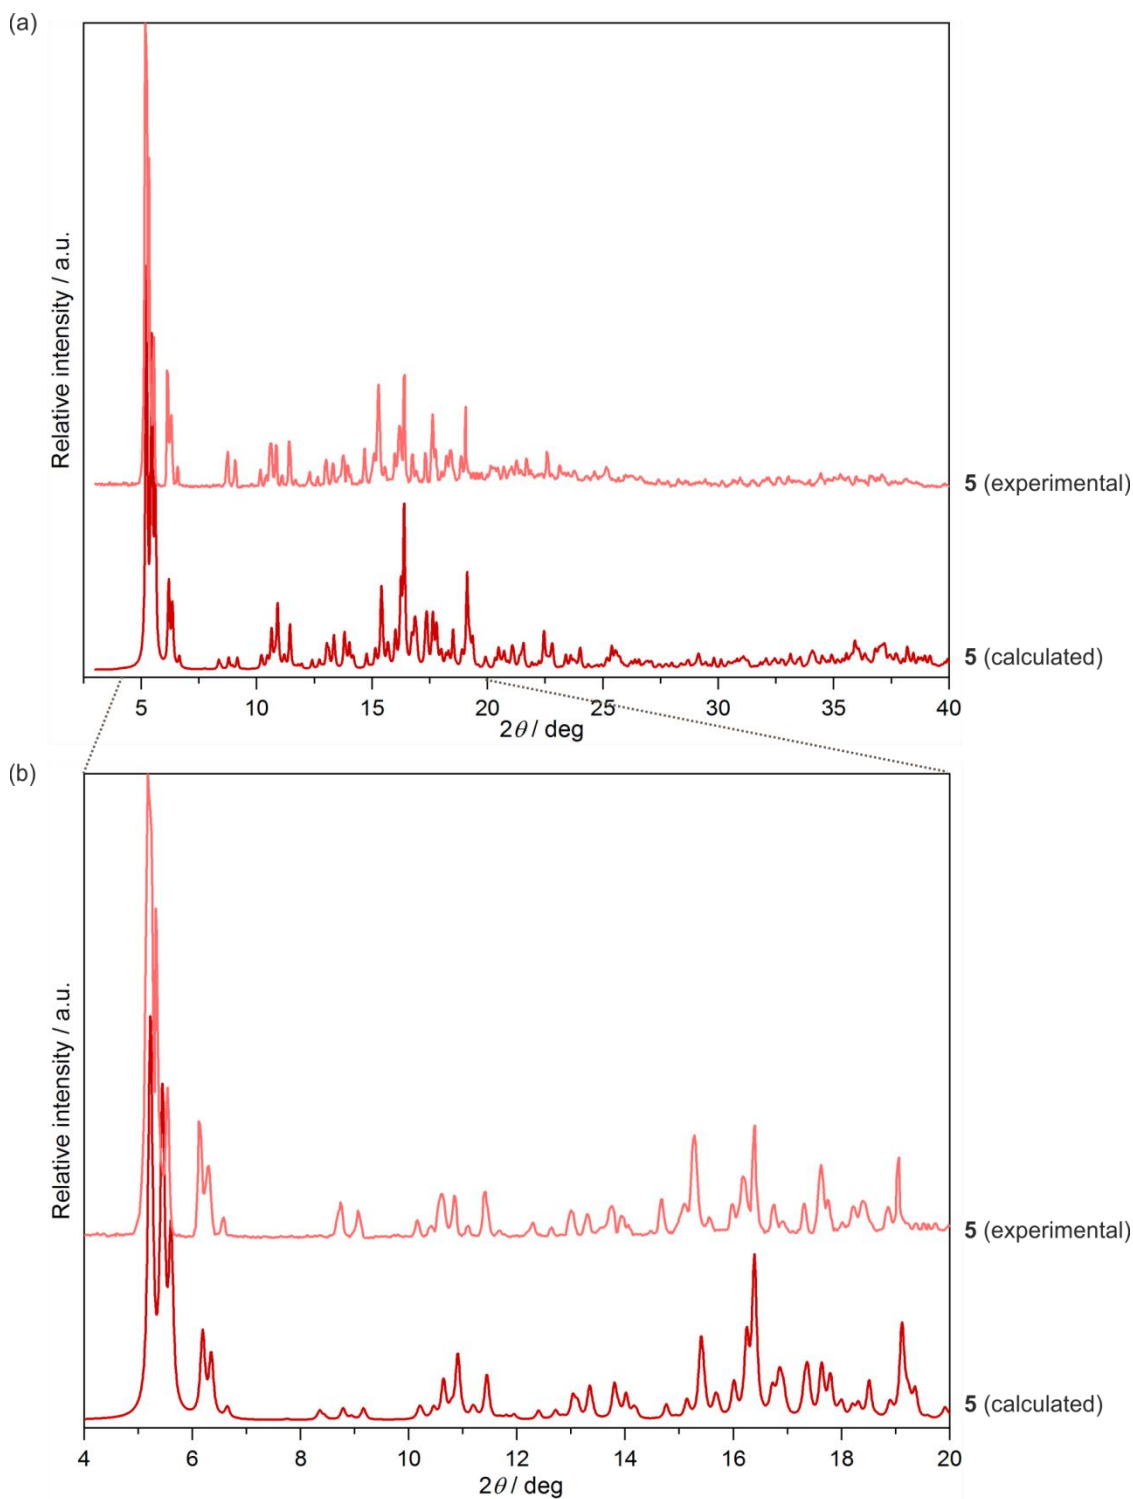

**Figure S7.** Experimental powder X-ray diffraction (PXRD) pattern of **5** presented in the broad  $2\theta$  range of 2.5–40° (a) and in the limited low angle  $2\theta$  range of 4–20° (b). In both cases, the experimental data were compared with the PXRD pattern calculated from the structural model obtained in the single-crystal X-ray diffraction structural analysis.

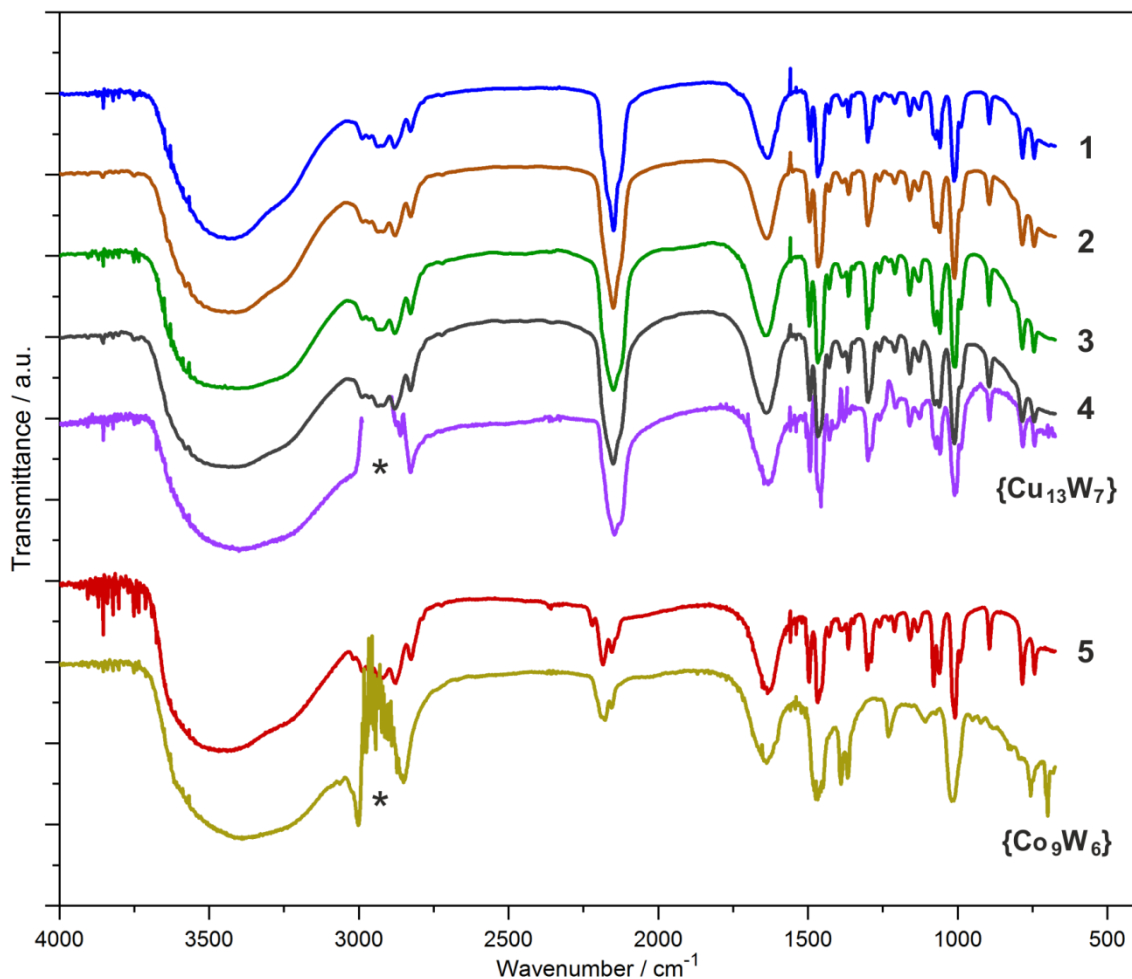

**Figure S8.** Infrared absorption spectra of **1–5** measured at room temperature for the selected single crystals in the 4000–700  $\text{cm}^{-1}$  range, compared with the reference compounds of  $\{[\text{Cu}^{\text{II}}_{13}(\text{Me}_3\text{tacn})_{12}(\text{H}_2\text{O})][\text{W}^{\text{IV}}(\text{CN})_8]_5[\text{W}^{\text{V}}(\text{CN})_8]_2\} \cdot 24\text{H}_2\text{O}$  ( $\text{Cu}_{13}\text{W}_7$ ) (*Inorg. Chem.*, 2010, **49**, 3101) and  $\{\text{Co}^{\text{II}}[\text{Co}^{\text{II}}(\text{MeOH})_3]_8[\text{W}^{\text{V}}(\text{CN})_8]_6\} \cdot 19\text{H}_2\text{O}$  ( $\text{Co}_9\text{W}_6$ ) molecules (*J. Am. Chem. Soc.*, 2005, **127**, 3708). The unusual discrepancies in the transmittance in the region of 3000–2800  $\text{cm}^{-1}$  (marked with asterisk) are due to the absorption of NVH immersion oil used for protection of the crystals.

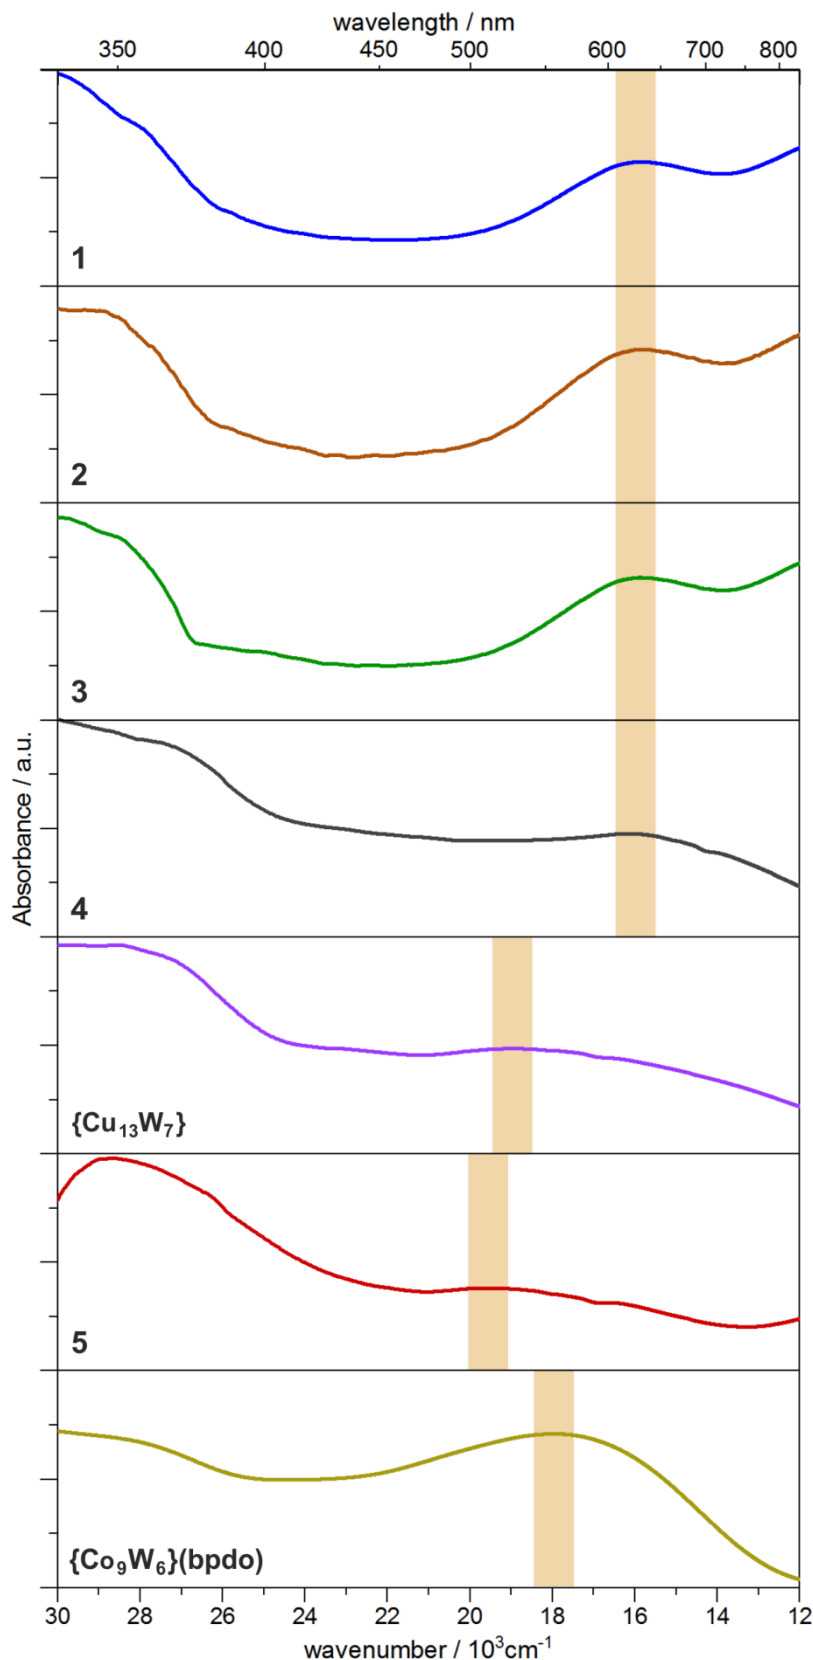

**Figure S9.** UV-vis absorption spectra of **1–5** measured at room temperature in the 30000–12000  $\text{cm}^{-1}$  (333–833 nm) range, compared with the reference compounds of  $\{[\text{Cu}^{\text{II}}_{13}(\text{Me}_3\text{tacn})_{12}(\text{H}_2\text{O})][\text{W}^{\text{IV}}(\text{CN})_8]_5[\text{W}^{\text{V}}(\text{CN})_8]_2\} \cdot 24\text{H}_2\text{O}$  (**Cu<sub>13</sub>W<sub>7</sub>**) (*Inorg. Chem.*, 2010, **49**, 3101) and  $\{\text{Co}^{\text{II}}_9(2,2'\text{-bpdo})_{6.5}(\text{MeOH})_{11}[\text{W}^{\text{V}}(\text{CN})_8]_6\} \cdot 8\text{H}_2\text{O} \cdot 2\text{MeCN} \cdot 27\text{MeOH}$  (**Co<sub>9</sub>W<sub>6</sub>-bpdo**) molecules (*Chem. Commun.*, 2016, **52**, 4772). The coloured boxes represent the frequency ranges of the main absorption maxima in the visible region: 610–650 nm for **1–4**, 515–540 nm for **Cu<sub>13</sub>W<sub>7</sub>**, 500–530 nm for **5** and 545–575 nm for **Co<sub>9</sub>W<sub>6</sub>-bpdo**.

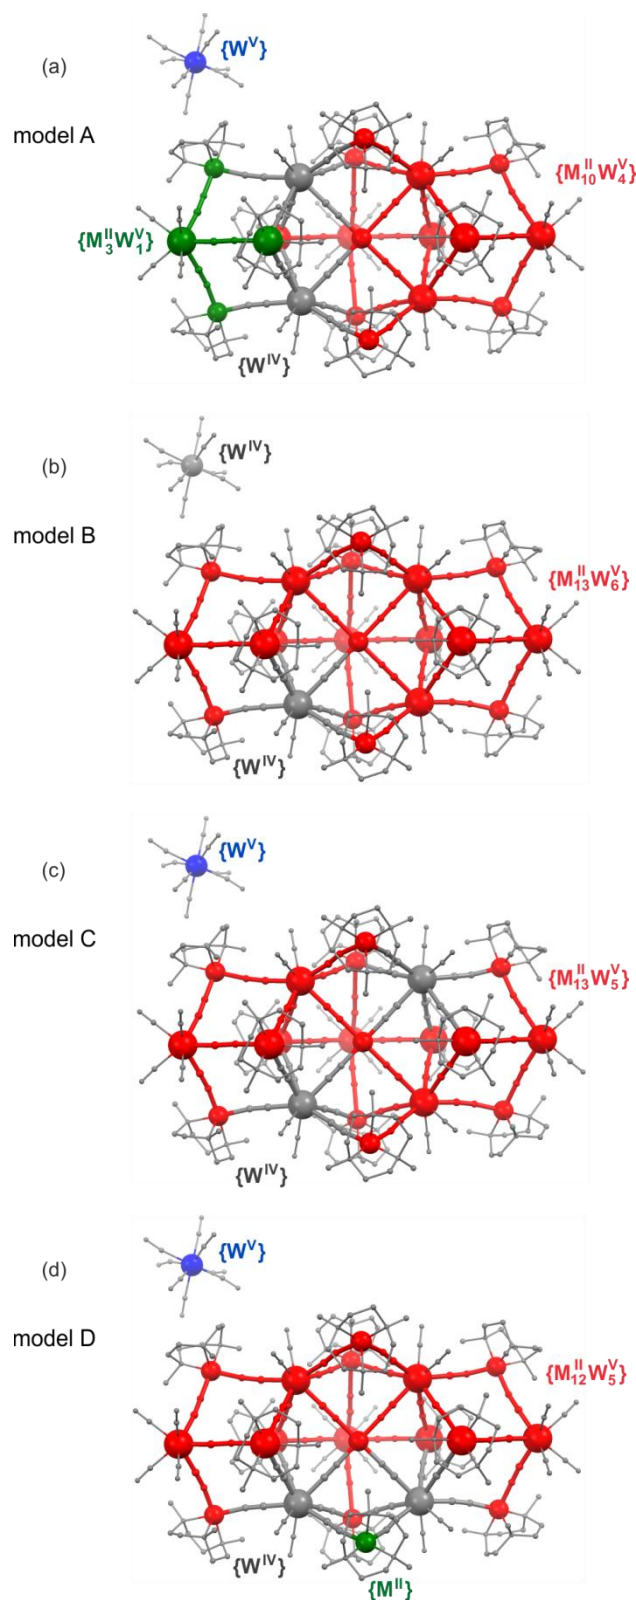

**Figure S10.** Four representative magnetic models analysed for the 20-centred cluster-based compounds 1–4: (a) model A with two intracluster  $\{M_{10}^{II}W_4^V\}$  and  $\{M_3^{II}W_1^V\}$  magnetic units and additional  $\{W^V\}$  magnetic counter-ion, (b) model B with  $\{M_{13}^{II}W_6^V\}$  magnetic unit, (c) model C with  $\{M_{13}^{II}W_5^V\}$  magnetic unit and  $\{W^V\}$  magnetic counter-ion, (d) model D with  $\{M_{12}^{II}W_5^V\}$  magnetic unit, separate  $\{M^{II}\}$  magnetic centre and  $\{W^V\}$  magnetic counter-ion. The resulting calculated values of maximal  $\chi_M T$  product and saturation magnetization,  $M_S$  for the respective magnetic models are shown in Tables S9–S10.

**Table S9.** Predicted values of maximal  $\chi_M T$  product and saturation magnetization,  $M_S$  for the respective magnetic models (Figure S10) analysed for the 20-centred cluster-based compound **2**.

| <b>compound 2, <math>\{\text{Ni}_{1.5}\text{Cu}_{11.5}\text{W}_7\} + \{\text{W}\}</math>,</b><br>assuming ferromagnetic Ni–W and Cu–W interactions,<br>$S_{\text{Ni}} = 1, S_{\text{Cu}} = 1/2, S_{\text{W}} = 1/2, g_{\text{Ni}} = 2.2, g_{\text{Cu}} = 2.0, g_{\text{W}} = 2.0$ |                                                                              | $S_{\text{GS}}$ | $g_{\text{av}}$ | $\chi_M T$<br>[cm <sup>3</sup> mol <sup>-1</sup> K] | $M_S$ [ $\mu_B$ ]     |
|-----------------------------------------------------------------------------------------------------------------------------------------------------------------------------------------------------------------------------------------------------------------------------------|------------------------------------------------------------------------------|-----------------|-----------------|-----------------------------------------------------|-----------------------|
| <b>model A <math>\{\text{M}^{\text{II}}_{10}\text{W}^{\text{V}}_4\} + \{\text{M}^{\text{II}}_3\text{W}^{\text{V}}_1\} + \{\text{W}^{\text{V}}\}</math></b>                                                                                                                        |                                                                              |                 |                 |                                                     |                       |
| Option A1<br>(12.5% probability)                                                                                                                                                                                                                                                  | $\{\text{Cu}^{\text{II}}_{10}\text{W}^{\text{V}}_4\}$                        | 7               | 2.00            | 28.00                                               | 14                    |
|                                                                                                                                                                                                                                                                                   | $\{\text{Ni}^{\text{II}}_1\text{Cu}^{\text{II}}_2\text{W}^{\text{V}}_1\}$    | 2.5             | 2.05            | 4.6                                                 | 5.12                  |
|                                                                                                                                                                                                                                                                                   | $\{\text{W}^{\text{V}}\}$                                                    | 0.5             | 2.00            | 0.37                                                | 1                     |
|                                                                                                                                                                                                                                                                                   | <b>sum</b>                                                                   | -               | -               | <b>32.97</b>                                        | <b>20.12</b>          |
| Option A2<br>(37.5% probability)                                                                                                                                                                                                                                                  | $\{\text{Ni}^{\text{II}}_1\text{Cu}^{\text{II}}_9\text{W}^{\text{V}}_4\}$    | 7.5             | 2.01            | 32.30                                               | 15.10                 |
|                                                                                                                                                                                                                                                                                   | $\{\text{Cu}^{\text{II}}_3\text{W}^{\text{V}}_1\}$                           | 2               | 2.00            | 3.00                                                | 4                     |
|                                                                                                                                                                                                                                                                                   | $\{\text{W}^{\text{V}}\}$                                                    | 0.5             | 2.00            | 0.37                                                | 1                     |
|                                                                                                                                                                                                                                                                                   | <b>sum</b>                                                                   | -               | -               | <b>35.67</b>                                        | <b>20.10</b>          |
| Option A3<br>(25% probability)                                                                                                                                                                                                                                                    | $\{\text{Ni}^{\text{II}}_1\text{Cu}^{\text{II}}_9\text{W}^{\text{V}}_4\}$    | 7.5             | 2.01            | 32.30                                               | 15.10                 |
|                                                                                                                                                                                                                                                                                   | $\{\text{Ni}^{\text{II}}_1\text{Cu}^{\text{II}}_2\text{W}^{\text{V}}_1\}$    | 2.5             | 2.05            | 4.6                                                 | 5.12                  |
|                                                                                                                                                                                                                                                                                   | $\{\text{W}^{\text{V}}\}$                                                    | 0.5             | 2.00            | 0.37                                                | 1                     |
|                                                                                                                                                                                                                                                                                   | <b>sum</b>                                                                   | -               | -               | <b>37.27</b>                                        | <b>21.22</b>          |
| Option A4<br>(25% probability)                                                                                                                                                                                                                                                    | $\{\text{Ni}^{\text{II}}_2\text{Cu}^{\text{II}}_8\text{W}^{\text{V}}_4\}$    | 8               | 2.03            | 37.09                                               | 16.24                 |
|                                                                                                                                                                                                                                                                                   | $\{\text{Cu}^{\text{II}}_3\text{W}^{\text{V}}_1\}$                           | 2               | 2.00            | 3.00                                                | 4                     |
|                                                                                                                                                                                                                                                                                   | $\{\text{W}^{\text{V}}\}$                                                    | 0.5             | 2.00            | 0.37                                                | 1                     |
|                                                                                                                                                                                                                                                                                   | <b>sum</b>                                                                   | -               | -               | <b>40.37</b>                                        | <b>21.24</b>          |
| <b>Average for model A</b>                                                                                                                                                                                                                                                        |                                                                              | -               | -               | <b>36.91</b>                                        | <b>20.65</b>          |
| <b>model B <math>\{\text{M}^{\text{II}}_{13}\text{W}^{\text{V}}_6\}</math></b>                                                                                                                                                                                                    |                                                                              |                 |                 |                                                     |                       |
| Option B1<br>(50% probability)                                                                                                                                                                                                                                                    | $\{\text{Ni}^{\text{II}}_1\text{Cu}^{\text{II}}_{12}\text{W}^{\text{V}}_6\}$ | 10              | 2.01            | 55.55                                               | 20.10                 |
| Option B2<br>(50% probability)                                                                                                                                                                                                                                                    | $\{\text{Ni}^{\text{II}}_2\text{Cu}^{\text{II}}_{11}\text{W}^{\text{V}}_6\}$ | 10.5            | 2.02            | 61.59                                               | 21.21                 |
| <b>Average for model B</b>                                                                                                                                                                                                                                                        |                                                                              | -               | -               | <b>58.57</b>                                        | <b>20.65</b>          |
| <b>model C <math>\{\text{M}^{\text{II}}_{13}\text{W}^{\text{V}}_5\} + \{\text{W}^{\text{V}}\}</math></b>                                                                                                                                                                          |                                                                              |                 |                 |                                                     |                       |
| Option C1<br>(50% probability)                                                                                                                                                                                                                                                    | $\{\text{Ni}^{\text{II}}_1\text{Cu}^{\text{II}}_{12}\text{W}^{\text{V}}_5\}$ | 9.5             | 2.01            | 50.37                                               | 19.10                 |
|                                                                                                                                                                                                                                                                                   | $\{\text{W}^{\text{V}}\}$                                                    | 0.5             | 2.00            | 0.37                                                | 1                     |
|                                                                                                                                                                                                                                                                                   | <b>sum</b>                                                                   | -               | -               | <b>50.74</b>                                        | <b>20.10</b>          |
| Option C2<br>(50% probability)                                                                                                                                                                                                                                                    | $\{\text{Ni}^{\text{II}}_2\text{Cu}^{\text{II}}_{11}\text{W}^{\text{V}}_5\}$ | 10              | 2.02            | 56.11                                               | 20.20                 |
|                                                                                                                                                                                                                                                                                   | $\{\text{W}^{\text{V}}\}$                                                    | 0.5             | 2.00            | 0.37                                                | 1                     |
|                                                                                                                                                                                                                                                                                   | <b>sum</b>                                                                   | -               | -               | <b>56.48</b>                                        | <b>21.20</b>          |
| <b>Average for model C</b>                                                                                                                                                                                                                                                        |                                                                              | -               | -               | <b>53.61</b>                                        | <b>20.65</b>          |
| <b>model D <math>\{\text{M}^{\text{II}}_{12}\text{W}^{\text{V}}_5\} + \{\text{M}^{\text{II}}\} + \{\text{W}^{\text{V}}\}</math></b>                                                                                                                                               |                                                                              |                 |                 |                                                     |                       |
| Option D1<br>(50% probability)                                                                                                                                                                                                                                                    | $\{\text{Ni}^{\text{II}}_1\text{Cu}^{\text{II}}_{11}\text{W}^{\text{V}}_5\}$ | 9               | 2.01            | 45.45                                               | 18.09                 |
|                                                                                                                                                                                                                                                                                   | $\{\text{M}^{\text{II}}\} = \{\text{Cu}^{\text{II}}\}$                       | 0.5             | 2.00            | 0.37                                                | 1                     |
|                                                                                                                                                                                                                                                                                   | $\{\text{W}^{\text{V}}\}$                                                    | 0.5             | 2.00            | 0.37                                                | 1                     |
|                                                                                                                                                                                                                                                                                   | <b>sum</b>                                                                   | -               | -               | <b>46.19</b>                                        | <b>20.09</b>          |
| Option D2<br>(50% probability)                                                                                                                                                                                                                                                    | $\{\text{Ni}^{\text{II}}_2\text{Cu}^{\text{II}}_{10}\text{W}^{\text{V}}_5\}$ | 9.5             | 2.02            | 50.88                                               | 19.19                 |
|                                                                                                                                                                                                                                                                                   | $\{\text{M}^{\text{II}}\} = \{\text{Cu}^{\text{II}}\}$                       | 0.5             | 2.00            | 0.37                                                | 1                     |
|                                                                                                                                                                                                                                                                                   | $\{\text{W}^{\text{V}}\}$                                                    | 0.5             | 2.00            | 0.37                                                | 1                     |
|                                                                                                                                                                                                                                                                                   | <b>sum</b>                                                                   | -               | -               | <b>51.62</b>                                        | <b>21.19</b>          |
| <b>Average for model D</b>                                                                                                                                                                                                                                                        |                                                                              | -               | -               | <b>48.91</b>                                        | <b>20.65</b>          |
| <b>Experimental values (Figure 5b)</b>                                                                                                                                                                                                                                            |                                                                              | -               | -               | <b>30.09 (9.0 K)</b>                                | <b>20.08 (70 kOe)</b> |

**Table S10.** Predicted values of maximal  $\chi_M T$  product and saturation magnetization,  $M_S$  for the 20-centred cluster-based compounds **1** and **3** using the selected magnetic model A (Figure S10).

| <b>compound 1, {Co<sub>1</sub>Cu<sub>12</sub>W<sub>7</sub>}+{W},</b><br>assuming ferromagnetic Co–W and Cu–W interactions,<br>$S_{\text{Co,eff,LT}} = 1/2, S_{\text{Cu}} = 1/2, S_{\text{W}} = 1/2, g_{\text{Co,eff,LT}} = 4.3, g_{\text{Cu}} = 2.0, g_{\text{W}} = 2.0$            |                                                                                            | $S_{\text{GS}}$ | $g_{\text{av}}$ | $\chi_M T$<br>[cm <sup>3</sup> mol <sup>-1</sup> K] | $M_S$ [ $\mu_B$ ]     |
|-------------------------------------------------------------------------------------------------------------------------------------------------------------------------------------------------------------------------------------------------------------------------------------|--------------------------------------------------------------------------------------------|-----------------|-----------------|-----------------------------------------------------|-----------------------|
| Option CoF1<br>(25% probability)                                                                                                                                                                                                                                                    | {Cu <sup>II</sup> <sub>10</sub> W <sup>V</sup> <sub>4</sub> }                              | 7               | 2.00            | 28.00                                               | 14                    |
|                                                                                                                                                                                                                                                                                     | {Co <sup>II</sup> <sub>1</sub> Cu <sup>II</sup> <sub>2</sub> W <sup>V</sup> <sub>1</sub> } | 2               | 2.57            | 4.95                                                | 5.14                  |
|                                                                                                                                                                                                                                                                                     | {W <sup>V</sup> }                                                                          | 0.5             | 2.00            | 0.37                                                | 1                     |
|                                                                                                                                                                                                                                                                                     | <b>sum</b>                                                                                 | -               | -               | <b>33.32</b>                                        | <b>20.14</b>          |
| Option CoF2<br>(75% probability)                                                                                                                                                                                                                                                    | {Co <sup>II</sup> <sub>1</sub> Cu <sup>II</sup> <sub>9</sub> W <sup>V</sup> <sub>4</sub> } | 7               | 2.16            | 32.66                                               | 15.12                 |
|                                                                                                                                                                                                                                                                                     | {Cu <sup>II</sup> <sub>3</sub> W <sup>V</sup> <sub>1</sub> }                               | 2               | 2.00            | 3.00                                                | 4                     |
|                                                                                                                                                                                                                                                                                     | {W <sup>V</sup> }                                                                          | 0.5             | 2.00            | 0.37                                                | 1                     |
|                                                                                                                                                                                                                                                                                     | <b>sum</b>                                                                                 | -               | -               | <b>36.03</b>                                        | <b>20.12</b>          |
| <b>Average for model A (ferro Co–W and Cu–W)</b>                                                                                                                                                                                                                                    |                                                                                            | -               | -               | <b>35.35</b>                                        | <b>20.13</b>          |
| <b>compound 1, {Co<sub>1</sub>Cu<sub>12</sub>W<sub>7</sub>}+{W},</b><br>assuming antiferro- Co–W and ferromagnetic Cu–W interactions,<br>$S_{\text{Co,eff,LT}} = 1/2, S_{\text{Cu}} = 1/2, S_{\text{W}} = 1/2, g_{\text{Co,eff,LT}} = 4.3, g_{\text{Cu}} = 2.0, g_{\text{W}} = 2.0$ |                                                                                            | $S_{\text{GS}}$ | $g_{\text{av}}$ | $\chi_M T$<br>[cm <sup>3</sup> mol <sup>-1</sup> K] | $M_S$ [ $\mu_B$ ]     |
| Option CoAF1<br>(25% probability)                                                                                                                                                                                                                                                   | {Cu <sup>II</sup> <sub>10</sub> W <sup>V</sup> <sub>4</sub> }                              | 7               | 2.00            | 28.00                                               | 14                    |
|                                                                                                                                                                                                                                                                                     | {Co <sup>II</sup> <sub>1</sub> Cu <sup>II</sup> <sub>2</sub> W <sup>V</sup> <sub>1</sub> } | 1               | 2.57            | 1.65                                                | 2.57                  |
|                                                                                                                                                                                                                                                                                     | {W <sup>V</sup> }                                                                          | 0.5             | 2.00            | 0.37                                                | 1                     |
|                                                                                                                                                                                                                                                                                     | <b>sum</b>                                                                                 | -               | -               | <b>30.02</b>                                        | <b>17.57</b>          |
| Option CoAF2<br>(75% probability)                                                                                                                                                                                                                                                   | {Co <sup>II</sup> <sub>1</sub> Cu <sup>II</sup> <sub>9</sub> W <sup>V</sup> <sub>4</sub> } | 6               | 2.16            | 24.49                                               | 12.96                 |
|                                                                                                                                                                                                                                                                                     | {Cu <sup>II</sup> <sub>3</sub> W <sup>V</sup> <sub>1</sub> }                               | 2               | 2.00            | 3.00                                                | 4                     |
|                                                                                                                                                                                                                                                                                     | {W <sup>V</sup> }                                                                          | 0.5             | 2.00            | 0.37                                                | 1                     |
|                                                                                                                                                                                                                                                                                     | <b>sum</b>                                                                                 | -               | -               | <b>27.86</b>                                        | <b>17.96</b>          |
| <b>Average for model A (antiferro Co–W and ferro Cu–W)</b>                                                                                                                                                                                                                          |                                                                                            | -               | -               | <b>28.40</b>                                        | <b>17.86</b>          |
| <b>Experimental values (Figure 5b)</b>                                                                                                                                                                                                                                              |                                                                                            | -               | -               | <b>16.58 (4.0 K)</b>                                | <b>20.58 (70 kOe)</b> |
| <b>compound 3, {Mn<sub>1.5</sub>Cu<sub>11.5</sub>W<sub>7</sub>}+{W},</b><br>assuming antiferro- Mn–W and ferromagnetic Cu–W interactions,<br>$S_{\text{Mn}} = 5/2, S_{\text{Cu}} = 1/2, S_{\text{W}} = 1/2, g_{\text{Mn}} = 2.0, g_{\text{Cu}} = 2.0, g_{\text{W}} = 2.0$           |                                                                                            | $S_{\text{GS}}$ | $g_{\text{av}}$ | $\chi_M T$<br>[cm <sup>3</sup> mol <sup>-1</sup> K] | $M_S$ [ $\mu_B$ ]     |
| Option MnAF1<br>(12.5% probability)                                                                                                                                                                                                                                                 | {Cu <sup>II</sup> <sub>10</sub> W <sup>V</sup> <sub>4</sub> }                              | 7               | 2.00            | 28.00                                               | 14                    |
|                                                                                                                                                                                                                                                                                     | {Mn <sup>II</sup> <sub>1</sub> Cu <sup>II</sup> <sub>2</sub> W <sup>V</sup> <sub>1</sub> } | 1               | 2.00            | 1.00                                                | 2                     |
|                                                                                                                                                                                                                                                                                     | {W <sup>V</sup> }                                                                          | 0.5             | 2.00            | 0.37                                                | 1                     |
|                                                                                                                                                                                                                                                                                     | <b>sum</b>                                                                                 | -               | -               | <b>29.37</b>                                        | <b>17</b>             |
| Option MnAF2<br>(37.5% probability)                                                                                                                                                                                                                                                 | {Mn <sup>II</sup> <sub>1</sub> Cu <sup>II</sup> <sub>9</sub> W <sup>V</sup> <sub>4</sub> } | 4               | 2.00            | 10.00                                               | 8                     |
|                                                                                                                                                                                                                                                                                     | {Cu <sup>II</sup> <sub>3</sub> W <sup>V</sup> <sub>1</sub> }                               | 2               | 2.00            | 3.00                                                | 4                     |
|                                                                                                                                                                                                                                                                                     | {W <sup>V</sup> }                                                                          | 0.5             | 2.00            | 0.37                                                | 1                     |
|                                                                                                                                                                                                                                                                                     | <b>sum</b>                                                                                 | -               | -               | <b>13.37</b>                                        | <b>13</b>             |
| Option MnAF3<br>(25% probability)                                                                                                                                                                                                                                                   | {Mn <sup>II</sup> <sub>1</sub> Cu <sup>II</sup> <sub>9</sub> W <sup>V</sup> <sub>4</sub> } | 4               | 2.00            | 10.00                                               | 8                     |
|                                                                                                                                                                                                                                                                                     | {Mn <sup>II</sup> <sub>1</sub> Cu <sup>II</sup> <sub>2</sub> W <sup>V</sup> <sub>1</sub> } | 1               | 2.00            | 1.00                                                | 1                     |
|                                                                                                                                                                                                                                                                                     | {W <sup>V</sup> }                                                                          | 0.5             | 2.00            | 0.37                                                | 1                     |
|                                                                                                                                                                                                                                                                                     | <b>sum</b>                                                                                 | -               | -               | <b>11.37</b>                                        | <b>10</b>             |
| Option MnAF4<br>(25% probability)                                                                                                                                                                                                                                                   | {Mn <sup>II</sup> <sub>2</sub> Cu <sup>II</sup> <sub>8</sub> W <sup>V</sup> <sub>4</sub> } | 1               | 2.00            | 1.00                                                | 2                     |
|                                                                                                                                                                                                                                                                                     | {Cu <sup>II</sup> <sub>3</sub> W <sup>V</sup> <sub>1</sub> }                               | 2               | 2.00            | 3.00                                                | 4                     |
|                                                                                                                                                                                                                                                                                     | {W <sup>V</sup> }                                                                          | 0.5             | 2.00            | 0.37                                                | 1                     |
|                                                                                                                                                                                                                                                                                     | <b>sum</b>                                                                                 | -               | -               | <b>4.37</b>                                         | <b>7</b>              |
| <b>Average for model A (antiferro Mn–W and ferro Cu–W)</b>                                                                                                                                                                                                                          |                                                                                            | -               | -               | <b>12.62</b>                                        | <b>11.25</b>          |
| <b>Experimental values (Figure 5b)</b>                                                                                                                                                                                                                                              |                                                                                            | -               | -               | <b>14.53 (18 K)</b>                                 | <b>12.95 (70 kOe)</b> |

**Table S11.** Predicted values of maximal  $\chi_M T$  product and saturation magnetization,  $M_S$  for the 20-centred cluster-based compound **4** using the selected magnetic model A (Figure S10).

| <b>compound 4, {Fe<sub>1.5</sub>Cu<sub>11.5</sub>W<sub>7</sub>}+{W},</b><br>assuming ferromagnetic Fe–W and Cu–W interactions,<br>$S_{\text{Fe}} = 2, S_{\text{Cu}} = 1/2, S_{\text{W}} = 1/2, g_{\text{Fe}} = 2.2, g_{\text{Cu}} = 2.0, g_{\text{W}} = 2.0$            |                                                                                            | $S_{\text{GS}}$ | $g_{\text{av}}$ | $\chi_M T$<br>[cm <sup>3</sup> mol <sup>-1</sup> K] | $M_S$ [ $\mu_B$ ]     |
|-------------------------------------------------------------------------------------------------------------------------------------------------------------------------------------------------------------------------------------------------------------------------|--------------------------------------------------------------------------------------------|-----------------|-----------------|-----------------------------------------------------|-----------------------|
| Option FeF1<br>(12.5% probability)                                                                                                                                                                                                                                      | {Cu <sup>II</sup> <sub>10</sub> W <sup>V</sup> <sub>4</sub> }                              | 7               | 2.00            | 28.00                                               | 14                    |
|                                                                                                                                                                                                                                                                         | {Fe <sup>II</sup> <sub>1</sub> Cu <sup>II</sup> <sub>2</sub> W <sup>V</sup> <sub>1</sub> } | 3.5             | 2.05            | 8.27                                                | 7.18                  |
|                                                                                                                                                                                                                                                                         | {W <sup>V</sup> }                                                                          | 0.5             | 2.00            | 0.37                                                | 1                     |
|                                                                                                                                                                                                                                                                         | <b>sum</b>                                                                                 | -               | -               | <b>36.64</b>                                        | <b>22.18</b>          |
| Option FeF2<br>(37.5% probability)                                                                                                                                                                                                                                      | {Fe <sup>II</sup> <sub>1</sub> Cu <sup>II</sup> <sub>9</sub> W <sup>V</sup> <sub>4</sub> } | 8.5             | 2.01            | 40.94                                               | 17.09                 |
|                                                                                                                                                                                                                                                                         | {Cu <sup>II</sup> <sub>3</sub> W <sup>V</sup> <sub>1</sub> }                               | 2               | 2.00            | 3.00                                                | 4                     |
|                                                                                                                                                                                                                                                                         | {W <sup>V</sup> }                                                                          | 0.5             | 2.00            | 0.37                                                | 1                     |
|                                                                                                                                                                                                                                                                         | <b>sum</b>                                                                                 | -               | -               | <b>44.31</b>                                        | <b>22.09</b>          |
| Option FeF3<br>(25% probability)                                                                                                                                                                                                                                        | {Fe <sup>II</sup> <sub>1</sub> Cu <sup>II</sup> <sub>9</sub> W <sup>V</sup> <sub>4</sub> } | 8.5             | 2.01            | 40.94                                               | 17.09                 |
|                                                                                                                                                                                                                                                                         | {Fe <sup>II</sup> <sub>1</sub> Cu <sup>II</sup> <sub>2</sub> W <sup>V</sup> <sub>1</sub> } | 3.5             | 2.05            | 8.27                                                | 7.18                  |
|                                                                                                                                                                                                                                                                         | {W <sup>V</sup> }                                                                          | 0.5             | 2.00            | 0.37                                                | 1                     |
|                                                                                                                                                                                                                                                                         | <b>sum</b>                                                                                 | -               | -               | <b>49.58</b>                                        | <b>25.27</b>          |
| Option FeF4<br>(25% probability)                                                                                                                                                                                                                                        | {Fe <sup>II</sup> <sub>2</sub> Cu <sup>II</sup> <sub>8</sub> W <sup>V</sup> <sub>4</sub> } | 10              | 2.03            | 56.60                                               | 20.30                 |
|                                                                                                                                                                                                                                                                         | {Cu <sup>II</sup> <sub>3</sub> W <sup>V</sup> <sub>1</sub> }                               | 2               | 2.00            | 3.00                                                | 4                     |
|                                                                                                                                                                                                                                                                         | {W <sup>V</sup> }                                                                          | 0.5             | 2.00            | 0.37                                                | 1                     |
|                                                                                                                                                                                                                                                                         | <b>sum</b>                                                                                 | -               | -               | <b>59.97</b>                                        | <b>25.30</b>          |
| <b>Average for model A (ferromagnetic Fe–W and Cu–W)</b>                                                                                                                                                                                                                |                                                                                            | -               | -               | <b>48.59</b>                                        | <b>23.70</b>          |
| <b>compound 4, {Fe<sub>1.5</sub>Cu<sub>11.5</sub>W<sub>7</sub>}+{W},</b><br>assuming antiferro- Fe–W and ferromagnetic Cu–W interactions,<br>$S_{\text{Fe}} = 2, S_{\text{Cu}} = 1/2, S_{\text{W}} = 1/2, g_{\text{Fe}} = 2.2, g_{\text{Cu}} = 2.0, g_{\text{W}} = 2.0$ |                                                                                            | $S_{\text{GS}}$ | $g_{\text{av}}$ | $\chi_M T$<br>[cm <sup>3</sup> mol <sup>-1</sup> K] | $M_S$ [ $\mu_B$ ]     |
| Option FeAF1<br>(12.5% probability)                                                                                                                                                                                                                                     | {Cu <sup>II</sup> <sub>10</sub> W <sup>V</sup> <sub>4</sub> }                              | 7               | 2.00            | 28.00                                               | 14                    |
|                                                                                                                                                                                                                                                                         | {Fe <sup>II</sup> <sub>1</sub> Cu <sup>II</sup> <sub>2</sub> W <sup>V</sup> <sub>1</sub> } | 0.5             | 2.05            | 0.39                                                | 1.02                  |
|                                                                                                                                                                                                                                                                         | {W <sup>V</sup> }                                                                          | 0.5             | 2.00            | 0.37                                                | 1                     |
|                                                                                                                                                                                                                                                                         | <b>sum</b>                                                                                 | -               | -               | <b>28.76</b>                                        | <b>16.02</b>          |
| Option FeAF2<br>(37.5% probability)                                                                                                                                                                                                                                     | {Fe <sup>II</sup> <sub>1</sub> Cu <sup>II</sup> <sub>9</sub> W <sup>V</sup> <sub>4</sub> } | 4.5             | 2.01            | 12.55                                               | 9.05                  |
|                                                                                                                                                                                                                                                                         | {Cu <sup>II</sup> <sub>3</sub> W <sup>V</sup> <sub>1</sub> }                               | 2               | 2.00            | 3.00                                                | 4                     |
|                                                                                                                                                                                                                                                                         | {W <sup>V</sup> }                                                                          | 0.5             | 2.00            | 0.37                                                | 1                     |
|                                                                                                                                                                                                                                                                         | <b>sum</b>                                                                                 | -               | -               | <b>15.92</b>                                        | <b>14.05</b>          |
| Option FeAF3<br>(25% probability)                                                                                                                                                                                                                                       | {Fe <sup>II</sup> <sub>1</sub> Cu <sup>II</sup> <sub>9</sub> W <sup>V</sup> <sub>4</sub> } | 4.5             | 2.01            | 12.55                                               | 9.05                  |
|                                                                                                                                                                                                                                                                         | {Fe <sup>II</sup> <sub>1</sub> Cu <sup>II</sup> <sub>2</sub> W <sup>V</sup> <sub>1</sub> } | 0.5             | 2.05            | 0.39                                                | 1.02                  |
|                                                                                                                                                                                                                                                                         | {W <sup>V</sup> }                                                                          | 0.5             | 2.00            | 0.37                                                | 1                     |
|                                                                                                                                                                                                                                                                         | <b>sum</b>                                                                                 | -               | -               | <b>13.31</b>                                        | <b>11.07</b>          |
| Option FeAF4<br>(25% probability)                                                                                                                                                                                                                                       | {Fe <sup>II</sup> <sub>2</sub> Cu <sup>II</sup> <sub>8</sub> W <sup>V</sup> <sub>4</sub> } | 2               | 2.03            | 3.09                                                | 4.06                  |
|                                                                                                                                                                                                                                                                         | {Cu <sup>II</sup> <sub>3</sub> W <sup>V</sup> <sub>1</sub> }                               | 2               | 2.00            | 3.00                                                | 4                     |
|                                                                                                                                                                                                                                                                         | {W <sup>V</sup> }                                                                          | 0.5             | 2.00            | 0.37                                                | 1                     |
|                                                                                                                                                                                                                                                                         | <b>sum</b>                                                                                 | -               | -               | <b>6.46</b>                                         | <b>9.06</b>           |
| <b>Average for model A (antiferro Fe–W and ferro Cu–W)</b>                                                                                                                                                                                                              |                                                                                            | -               | -               | <b>14.51</b>                                        | <b>12.30</b>          |
| <b>Experimental values (Figure 5b)</b>                                                                                                                                                                                                                                  |                                                                                            | -               | -               | <b>24.60 (1.8 K)</b>                                | <b>22.13 (70 kOe)</b> |
